# Supplementary material for: Systematic review of the global epidemiology, clinical and laboratory profile of enteric fever
Source: PubMed Central journal article supplement (PMC4672836; doi:10.7189/jogh.05.020407), 2015-12
Supplement: jogh-05-020407-s001.pdf [file jogh-05-020407-s001.pdf]

## Online Supplementary Document

Azmatullah et al. Systematic review of the global epidemiology, clinical and laboratory profile of enteric fever  
 J Glob Health 2015;5:010407

### Supplementary tables and definitions of variables

- Table S1: Epidemiology of enteric fever by age

| Demographics/History                               | 0 to 5 years<br>14 studies |     |            | 5 to 10 years<br>6 studies |     |            | 10 to 17 years<br>4 studies |     |            | Adults<br>(12 years & up)<br>69 studies |      |           |
|----------------------------------------------------|----------------------------|-----|------------|----------------------------|-----|------------|-----------------------------|-----|------------|-----------------------------------------|------|-----------|
|                                                    | N                          | N   | %          | n                          | N   | %          | n                           | N   | %          | n                                       | N    | %         |
| Males                                              | 314                        | 529 | <b>59</b>  | 421                        | 714 | <b>59</b>  | 135                         | 237 | <b>57</b>  | 2761                                    | 4551 | <b>61</b> |
| Blood/bone marrow Isolates                         | 615                        | 655 | <b>94</b>  | 695                        | 695 | <b>100</b> | 282                         | 282 | <b>100</b> | 4153                                    | 4465 | <b>93</b> |
| Pre-treatment antibiotics received                 | 2                          | 16  | <b>13</b>  |                            |     |            |                             |     |            | 510                                     | 1240 | <b>41</b> |
| Duration of illness ≤ 1 week                       | 13                         | 22  | <b>59</b>  |                            |     |            |                             |     |            | 287                                     | 506  | <b>57</b> |
| Duration of illness within 1-2weeks                | 7                          | 18  | <b>39</b>  |                            |     |            |                             |     |            | 45                                      | 195  | <b>23</b> |
| Duration of illness > 2 weeks                      | 2                          | 18  | <b>11</b>  |                            |     |            |                             |     |            | 115                                     | 691  | <b>17</b> |
| Duration of illness > 1 week                       | 9                          | 18  | <b>50</b>  |                            |     |            |                             |     |            | 293                                     | 971  | <b>30</b> |
| Multi-drug resistant isolates                      | 94                         | 383 | <b>25</b>  | 121                        | 558 | <b>22</b>  | 58                          | 237 | <b>24</b>  | 913                                     | 1726 | <b>53</b> |
| Fluoroquinolone resistance                         | 10                         | 161 | <b>6</b>   |                            |     |            |                             |     |            | 11                                      | 1662 | <b>1</b>  |
| Chloramphenicol resistance                         | 47                         | 99  | <b>47</b>  |                            |     |            |                             |     |            | 1119                                    | 1877 | <b>60</b> |
| Ampicillin/Amoxycillin resistance                  | 36                         | 71  | <b>51</b>  |                            |     |            |                             |     |            | 1081                                    | 1461 | <b>74</b> |
| Co-trimoxazole resistance                          | 28                         | 71  | <b>39</b>  |                            |     |            |                             |     |            | 936                                     | 1158 | <b>81</b> |
| <b>Laboratory features</b>                         |                            |     |            |                            |     |            |                             |     |            |                                         |      |           |
| Severe anaemia (<7.5 g/dl)                         | 45                         | 91  | <b>49</b>  |                            |     |            |                             |     |            | 17                                      | 437  | <b>4</b>  |
| Neutrophilia(>7.5 x 10 <sup>3</sup> /μL)           | 9                          | 9   | <b>100</b> |                            |     |            |                             |     |            | 4                                       | 50   | <b>8</b>  |
| Thrombocytopenia (<150 x 10 <sup>3</sup> /μL)      | 0                          | 12  | <b>0</b>   | 5                          | 28  | <b>18</b>  | 4                           | 31  | <b>13</b>  | 210                                     | 395  | <b>53</b> |
| Severe thrombocytopenia(<50 x 10 <sup>3</sup> /μL) |                            |     |            |                            |     |            |                             |     |            | 13                                      | 194  | <b>7</b>  |
| Hemolysis or hemolytic anaemia                     |                            |     |            |                            |     |            |                             |     |            | 1                                       | 100  | <b>1</b>  |
| <b>Other signs and symptoms</b>                    |                            |     |            |                            |     |            |                             |     |            |                                         |      |           |
| Chills or rigors                                   | 4                          | 33  | <b>12</b>  | 4                          | 125 | <b>3</b>   |                             |     |            | 362                                     | 769  | <b>47</b> |
| Bradycardia/relative bradycardia                   |                            |     |            |                            |     |            |                             |     |            | 532                                     | 1142 | <b>47</b> |
| Dehydration                                        |                            |     |            |                            |     |            | 1                           | 8   | <b>13</b>  | 164                                     | 288  | <b>57</b> |
| Anorexia/refusal to feed                           | 36                         | 55  | <b>65</b>  | 82                         | 125 | <b>66</b>  |                             |     |            | 355                                     | 765  | <b>46</b> |
| Weakness/dizziness or malaise                      |                            |     |            |                            |     |            | 5                           | 8   | <b>63</b>  | 223                                     | 472  | <b>47</b> |
| Continuous fever                                   | 8                          | 18  | <b>44</b>  |                            |     |            |                             |     |            | 113                                     | 274  | <b>41</b> |
| Intermittent fever                                 | 5                          | 18  | <b>28</b>  |                            |     |            |                             |     |            | 32                                      | 191  | <b>17</b> |
| Remittent fever                                    | 5                          | 18  | <b>28</b>  |                            |     |            |                             |     |            | 86                                      | 199  | <b>43</b> |
| Stepladder fever                                   |                            |     |            |                            |     |            |                             |     |            | 63                                      | 255  | <b>25</b> |
| Chelosis                                           |                            |     |            |                            |     |            |                             |     |            | 2                                       | 82   | <b>2</b>  |
| URTI                                               | 5                          | 34  | <b>15</b>  | 14                         | 65  | <b>22</b>  | 5                           | 45  | <b>11</b>  | 34                                      | 334  | <b>10</b> |
| <b>Other complications</b>                         |                            |     |            |                            |     |            |                             |     |            |                                         |      |           |
| Myocarditis                                        | 1                          | 51  | <b>2</b>   | 6                          | 125 | <b>5</b>   |                             |     |            | 72                                      | 862  | <b>8</b>  |
| Meningitis or meningismus                          | 7                          | 139 | <b>5</b>   | 3                          | 153 | <b>2</b>   | 0                           | 31  | <b>0</b>   | 29                                      | 1645 | <b>2</b>  |
| Hepatitis or raised LFTs                           | 17                         | 47  | <b>36</b>  | 19                         | 72  | <b>26</b>  |                             |     |            | 547                                     | 1955 | <b>28</b> |
| Jaundice                                           | 6                          | 46  | <b>13</b>  | 0                          | 28  | <b>0</b>   | 1                           | 39  | <b>3</b>   | 43                                      | 985  | <b>4</b>  |
| DIC                                                |                            |     |            |                            |     |            |                             |     |            | 22                                      | 573  | <b>4</b>  |
| Acute acalculouscholecystitis                      | 7                          | 71  | <b>10</b>  |                            |     |            |                             |     |            | 7                                       | 97   | <b>7</b>  |
| Edema or pleural effusion or ascites               | 0                          | 12  | <b>0</b>   | 6                          | 69  | <b>9</b>   | 1                           | 31  | <b>3</b>   | 9                                       | 512  | <b>2</b>  |
| Convulsions                                        | 10                         | 122 | <b>8</b>   | 3                          | 125 | <b>2</b>   | 0                           | 8   | <b>0</b>   |                                         |      |           |

|                                    |    |     |           |    |     |           |   |    |           |      |           |           |
|------------------------------------|----|-----|-----------|----|-----|-----------|---|----|-----------|------|-----------|-----------|
| Focal neurological involvement     |    |     |           |    |     |           |   |    | 96        | 1102 | <b>9</b>  |           |
| Epistaxis/bleeding (unspecified)   | 16 | 140 | <b>11</b> | 16 | 166 | <b>10</b> |   |    | 15        | 315  | <b>5</b>  |           |
| Any abscess                        | 1  | 71  | <b>1</b>  |    |     |           |   |    | 16        | 435  | <b>4</b>  |           |
| Osteomyelitis or septic arthritis  | 11 | 116 | <b>9</b>  |    |     |           |   |    | 2         | 30   | <b>7</b>  |           |
| Renal involvement                  | 2  | 71  | <b>3</b>  |    |     |           |   |    | 140       | 1277 | <b>11</b> |           |
| Arthritis or arthralgia or myalgia | 0  | 18  | <b>0</b>  | 1  | 28  | <b>4</b>  | 4 | 39 | <b>10</b> | 194  | 1285      | <b>15</b> |

- **Table S2: Associations of clinical features in enteric fever by age (0-5 yrs old versus 5-10 yrs old )**

| Clinical Features                        | Odds Ratio | 95% Confidence Interval |
|------------------------------------------|------------|-------------------------|
| Headache                                 | 0.1        | 0.05 - 0.2              |
| Diarrhea                                 | 2.5        | 2.0 - 3.2               |
| Constipation                             | 0.4        | 0.3 - 0.6               |
| Nausea or vomiting                       | 0.6        | 0.4 - 0.8               |
| Hepatomegaly                             | 1.3        | 1.0 - 1.6               |
| Abdominal pain or tenderness             | 0.1        | 0.07 - 0.2              |
| Abdominal distention or ileus            | 0.2        | 0.1 - 0.4               |
| Leucopenia (< 5 x 10 <sup>3</sup> /μL)   | 0.2        | 0.1 - 0.4               |
| Leucocytosis(> 15 x 10 <sup>3</sup> /μL) | 4.6        | 3.5 - 6.2               |
| Altered mental status                    | 0.4        | 0.2 - 0.6               |
| Chills or rigors                         | 4.1        | 1.0 - 17.7              |
| Death                                    | 4.6        | 2.3 - 9.2               |

- **Table S3: Associations of clinical features in enteric fever by age (children versus adults\*)**

| Clinical Features                             | Odds Ratio | 95% Confidence Interval |
|-----------------------------------------------|------------|-------------------------|
| Multi-drug resistant isolates                 | 0.3        | 0.2- 0.3                |
| Pre-treatment antibiotics received            | 0.2        | 0.04 - 0.9              |
| Coated tongue                                 | 3.5        | 2.5- 5.1                |
| Cough                                         | 0.7        | 0.6- 0.9                |
| Nausea or vomiting                            | 0.7        | 0.5- 0.8                |
| Diarrhea                                      | 0.6        | 0.5 - 0.6               |
| Constipation                                  | 0.7        | 0.6 - 0.9               |
| Hepatomegaly                                  | 2.1        | 1.8- 2.5                |
| Splenomegaly                                  | 0.6        | 0.5- 0.7                |
| Abdominal distention or ileus                 | 2.7        | 2.0- 3.7                |
| Anemia (Hb < 12 g/dl)                         | 5.8        | 3.8- 9.0                |
| Leucopenia (< 5 x 10 <sup>3</sup> /μL)        | 1.4        | 1.0- 1.8                |
| Leucocytosis (> 15 x 10 <sup>3</sup> /μL)     | 2.7        | 1.8- 4.0                |
| Thrombocytopenia (<150 x 10 <sup>3</sup> /μL) | 0.1        | 0.05- 0.3               |
| Altered mental status                         | 0.7        | 0.6- 0.9                |
| GI perforation                                | 0.4        | 0.2- 0.8                |
| Pneumonia or chest signs                      | 1.7        | 1.3- 2.2                |
| Hepatitis or raised LFTs                      | 5.9        | 3.9 - 8.8               |
| Jaundice                                      | 1.9        | 1.0 - 3.5               |
| Chills or rigors                              | 0.06       | 0.03- 0.1               |

|                                      |      |             |
|--------------------------------------|------|-------------|
| URTI                                 | 2.1  | 1.1- 3.9    |
| High grade fever                     | 0.3  | 0.1 - 0.5   |
| Fluoroquinolone resistance           | 9.4  | 3.9- 22.5   |
| Chloramphenicol resistance           | 0.6  | 0.4 - 0.9   |
| Ampicillin/Amoxicillin resistance    | 0.4  | 0.2 - 0.6   |
| Co-trimoxazole resistance            | 0.2  | 0.1 - 0.3   |
| Severe anaemia (<7.5)                | 24.2 | 12.8 - 45.6 |
| Anorexia/refusal to feed             | 2.2  | 1.6 - 3.1   |
| Edema or pleural effusion or ascites | 4.5  | 1.5 - 12.9  |
| Epistaxis/bleeding (unspecified)     | 2.3  | 1.2 - 4.4   |
| Renal involvement                    | 0.2  | 0.06 - 1.0  |
| Arthritis or arthralgia or myalgia   | 0.1  | 0.02 - 1.0  |

\* Children - 0 - 5 yrs old versus 5 - 10 yrs old  
 Adults - Author defined or aged 12 years and above

References to Table 1 , Table S1, S2 and S3: Epidemiology of enteric fever by age

Ages 0- 5 years

1. Bhutta ZA. Impact of age and drug resistance on mortality in typhoid fever. *ArchDisChild*. 1996;75(3):214-7.
2. Chiu CH, Lin TY. Typhoid fever in children. *Lancet*. 1999;354(9194):2001-2.
3. Chiu CH, Tsai JR, Ou JT, Lin TY. Typhoid fever in children: a fourteen-year experience. *Acta PaediatrTaiwan*. 2000;41(1):28-32.
4. Duggan MB, Beyer L. Enteric fever in young Yoruba children. *ArchDisChild*. 1975;50(1):67-71.
5. Emary K, Moore CE, Chanpheaktra N, An KP, Chheng K, Sona S, et al. Enteric fever in Cambodian children is dominated by multidrug-resistant H58 *Salmonella enterica* serovar Typhi with intermediate susceptibility to ciprofloxacin. *Trans R Soc Trop Med Hyg*. 2012 Dec;106(12):718-24.
6. Ferreccio C, Levine MM, Manterola A, Rodriguez G, Rivara I, Prenzel I, et al. Benign bacteremia caused by *Salmonella typhi* and paratyphi in children younger than 2 years. *J Pediatr*. 1984;104(6):899-901.
7. Garg RA, Krashak R. Typhoid fever before two years of age. *Indian Pediatr*. 1993;30(6):805-8.
8. Green SD, Cheesbrough JS. *Salmonella* bacteraemia among young children at a rural hospital in western Zaire. *AnnTropPaediatr*. 1993;13(1):45-53.
9. Oh HM, Masayu Z, Chew SK. Typhoid fever in hospitalized children in Singapore. *J Infect*. 1997;34(3):237-42.
10. Owais A, Sultana S, Zaman U, Rizvi A, Zaidi AK. Incidence of typhoid bacteremia in infants and young children in southern coastal Pakistan. *Pediatr Infect Dis J*. 2010 Nov;29(11):1035-9.
11. Palacios Malmaceda PG, Vela Acosta JJ, Gutierrez AW. [Typhoid fever in children under 2 years of age]. *BolMedHospInfant Mex*. 1981;38(3):473-83.
12. Rajajee S, Anandi TB, Subha S, Vatsala BR. Patterns of resistant *Salmonella typhi* infection in infants. *JTropPaediatr*. 1995;41(1):52-4.

13. Sinha A, Sazawal S, Kumar R, Sood S, Reddaiah VP, Singh B, et al. Typhoid fever in children aged less than 5 years. *Lancet*. 1999;354(9180):734-7.
14. Soelistyowati S, Soenarto Y, Soesilo H, Widiarto, Widiatmodjo, Ismangoen. Typhoid fever in children. *PaediatrIndones*. 1982;22(7-8):138-46.
15. Walia M, Gaind R, Paul P, Mehta R, Aggarwal P, Kalaivani M. Age-related clinical and microbiological characteristics of enteric fever in India. *TransRSocTropMed Hyg*. 2006;100(10):942-8.
16. Wang JL, Kao JH, Tseng SP, Teng LJ, Ho SW, Hsueh PR. Typhoid fever and typhoid hepatitis in Taiwan. *EpidemiolInfect*. 2005;133(6):1073-9.

#### Ages 5 -10 years

1. Bhutta ZA. Impact of age and drug resistance on mortality in typhoid fever. *ArchDisChild*. 1996;75(3):214-7.
2. Chiu CH, Lin TY. Typhoid fever in children. *Lancet*. 1999;354(9194):2001-2.
3. Chiu CH, Tsai JR, Ou JT, Lin TY. Typhoid fever in children: a fourteen-year experience. *Acta PaediatrTaiwan*. 2000;41(1):28-32.
4. Emary K, Moore CE, Chanpheaktra N, An KP, Chheng K, Sona S, et al. Enteric fever in Cambodian children is dominated by multidrug-resistant H58 *Salmonella enterica* serovar Typhi with intermediate susceptibility to ciprofloxacin. *Trans R Soc Trop Med Hyg*. 2012 Dec;106(12):718-24
5. Leung DT, Bogetz J, Itoh M, Ganapathi L, Pietroni MA, Ryan ET, et al. Factors associated with encephalopathy in patients with *Salmonella enterica* serotype Typhi bacteremia presenting to a diarrheal hospital in Dhaka, Bangladesh. *Am J Trop Med Hyg*. 2012 Apr;86(4):698-702.
6. Moussa K. Enterica of childhood. *J EgyptPublic Health Assoc*. 1970;45(1):48-55.
7. Oh HM, Masayu Z, Chew SK. Typhoid fever in hospitalized children in Singapore. *J Infect*. 1997;34(3):237-42.
8. Soelistyowati S, Soenarto Y, Soesilo H, Widiarto, Widiatmodjo, Ismangoen. Typhoid fever in children. *PaediatrIndones*. 1982;22(7-8):138-46.
9. Walia M, Gaind R, Paul P, Mehta R, Aggarwal P, Kalaivani M. Age-related clinical and microbiological characteristics of enteric fever in India. *TransRSocTropMed Hyg*. 2006;100(10):942-8.

#### Ages 10-17yrs

1. Bhutta ZA. Impact of age and drug resistance on mortality in typhoid fever. *ArchDisChild*. 1996;75(3):214-7.
2. Chiu CH, Lin TY. Typhoid fever in children. *Lancet*. 1999;354(9194):2001-2.
3. Chiu CH, Tsai JR, Ou JT, Lin TY. Typhoid fever in children: a fourteen-year experience. *Acta PaediatrTaiwan*. 2000;41(1):28-32.
4. Emary K, Moore CE, Chanpheaktra N, An KP, Chheng K, Sona S, et al. Enteric fever in Cambodian children is dominated by multidrug-resistant H58 *Salmonella enterica* serovar Typhi with intermediate susceptibility to ciprofloxacin. *Trans R Soc Trop Med Hyg*. 2012 Dec;106(12):718-24
5. Kanra G, Yurdakok M, Secmeer G, Arvas A, Dereli O, Sarikayalar F, et al. Clinical findings of pediatric patients during an outbreak of typhoid fever in Ankara. *TurkJ Pediatr*. 1985;27(1):11-5.
6. Moussa K. Enterica of childhood. *J EgyptPublic Health Assoc*. 1970;45(1):48-55.

## Adults

1. Abraham G, Teklu B. Typhoid fever: clinical analysis of 50 Ethiopian patients. *EthiopMed J.* 1981;19(2):41-6.
2. Aghanwa HS, Morakinyo O. Correlates of psychiatric morbidity in typhoid fever in a Nigerian general hospital setting. *GenHospPsychiatry.* 2001;23(3):158-62.
3. Ali G, Rashid S, Kamli MA, Shah PA, Allaqaband GQ. Spectrum of neuropsychiatric complications in 791 cases of typhoid fever. *TropMed Int Health.* 1997;2(4):314-8.
4. Abdool Gaffar MS, Seedat YK, Coovadia YM, Khan Q. The white cell count in typhoid fever. *TropGeogrMed.* 1992;44(1-2):23-7.
5. Alsoub H, Uwaydah AK, Matar I, Zebeib M, Elhag KM. A clinical comparison of typhoid fever caused by susceptible and multidrug-resistant strains of *Salmonella typhi*. *BrJ ClinPract.* 1997;51(1):8-10.
6. Alam MN, Haq SA, Das KK, Baral PK, Mazid MN, Siddique RU, et al. Efficacy of ciprofloxacin in enteric fever: comparison of treatment duration in sensitive and multidrug-resistant *Salmonella*. *AmJTropMedHyg.* 1995;53(3):306-11.
7. Barrett FC, Knudsen JD, Johansen IS. Cases of typhoid fever in Copenhagen region: a retrospective study of presentation and relapse. *BMC research notes.* 2013;6:315.
8. Bhatia RS. Changing trends in the presentation and treatment of enteric fever: our experience. *The Journal of the Association of Physicians of India.* 1992;40(4):283-4.
9. Butler T, Bell WR, Levin J, Linh NN, Arnold K. Typhoid fever. Studies of blood coagulation, bacteremia, and endotoxemia. *Arch Intern Med.* 1978 Mar;138(3):407-10.
10. Butler T, Linh NN, Arnold K, Pollack M. Chloramphenicol-resistant typhoid fever in Vietnam associated with R factor. *Lancet.* 1973;2(7836):983-5.
11. Carcelen A, Chirinos J, Yi A. Furazolidone and chloramphenicol for treatment of typhoid fever. *ScandJGastroenterolSuppl.* 1989;169:19-23.
12. Catalano G, Del Vecchio-Blanco C, Varone GL. Changing pattern of typhoid fever: clinical bacteriological and immunological aspects. *BollIstSieroterMilan.* 1972;51(2):157-64.
13. Caumes E, Ehya N, Nguyen J, Bricaire F. Typhoid and paratyphoid fever: a 10-year retrospective study of 41 cases in a Parisian hospital. *J TravelMed.* 2001;8(6):293-7.
14. Chakravorty B, Jain N, Gupta B, Rajvanshi P, Sen MK, Krishna A. Chloramphenicol resistant enteric fever. *J Indian Med Assoc.* 1993;91(1):10-3.
15. Clark TW, Daneshvar C, Pareek M, Perera N, Stephenson I. Enteric fever in a UK regional infectious diseases unit: a 10 year retrospective review. *J Infect.* 2010 Feb;60(2):91-8.
16. Chuttani HK, Jain K, Misra RC. Small bowel in typhoid fever. *Gut.* 1971 Sep;12(9):709-12.
17. Daga MK, Sarin K, Sarkar R. A study of culture positive multidrug resistant enteric fever--changing pattern and emerging resistance to ciprofloxacin. *J AssocPhysicians India.* 1994;42(8):599-600.
18. Daoud AS, Zaki M, Pugh RN, al-Mutairi G, Beseiso R, Nasrallah AY. Clinical presentation of enteric fever: its changing pattern in Kuwait. *J TropMed Hyg.* 1991;94(5):341-7.
19. Downey D, Anzimlt JC, Ellis-Pegler RB. *Salmonella typhi* infection in adults is not limited to travellers returning from the tropics. *NZMed J.* 1986;99(804):443-6.

20. Duff P, Engelsgerd B. Typhoid fever on an obstetrics-gynecology service. *AmJ ObstetGynecol.* 1983;145(1):113-4.
21. Dutta TK, Beerasha, Ghotekar LH. Atypical manifestations of typhoid fever. *JPostgradMed.* 2001;47(4):248-51.
22. Goh KT, Teo SH, Tay L, Monteiro EH. Epidemiology and control of an outbreak of typhoid in a psychiatric institution. *EpidemiolInfect.* 1992;108(2):221-9.
23. Gupta S, Meena HS. Changing profile of enteric fever--in summer-91. *J AssocPhysicians India.* 1992;40(11):726-9.
24. Gupta SP, Gupta MS, Bhardwaj S, Chugh TD. Current clinical patterns of typhoid fever: a prospective study. *J TropMed Hyg.* 1985;88(6):377-81.
25. Gupta V, Kaur U, Singh G, Prakash C, Sharma M, Aggarwal KC. An outbreak of typhoid fever in Chandigarh, North India. *TropGeogrMed.* 1986;38(1):51-4.
26. Haq SA, Alam MN, Hossain SM, Ahmed T, Tahir M. Value of clinical features in the diagnosis of enteric fever. *Bangladesh Med ResCouncBull.* 1997;23(2):42-6.
27. Hoa NT, Diep TS, Wain J, Parry CM, Hien TT, Smith MD, et al. Community-acquired septicaemia in southern Viet Nam: the importance of multidrug-resistant *Salmonella typhi*. *TransRSocTropMedHyg.* 1998;92(5):503-8.
28. Hosoglu S, Geyik MF, Akalin S, Ayaz C, Kokoglu OF, Loeb M. A simple validated prediction rule to diagnose typhoid fever in Turkey. *TransRSocTropMed Hyg.* 2006;100(11):1068-74.
29. Hyams KC, Oldfield EC, Scott RM, Bourgeois AL, Gardiner H, Pazzaglia G, et al. Evaluation of febrile patients in Port Sudan, Sudan: isolation of dengue virus. *AmJ TropMed Hyg.* 1986;35(4):860-5.
30. Ispahani P, Slack RC. Enteric fever and other extraintestinal salmonellosis in University Hospital, Nottingham, UK, between 1980 and 1997. *EurJ ClinMicrobiolInfectDis.* 2000;19(9):679-87.
31. Kamat SA. Evaluation of therapeutic efficacy of trimethoprim-sulphamethoxazole and chloramphenicol in enteric fever. *BrMedJ.* 1970;3(5718):320-2.
32. Kamat SA, Herzog C. Typhoid: clinical picture and response to chloramphenicol. Prospective study in Bombay (1972). *Infection.* 1977;5(2):85-91.
33. Khan M, Coovadia Y, Connolly C, Sturm AW. Risk factors predicting complications in blood culture-proven typhoid fever in adults. *ScandJ InfectDis.* 2000;32(2):201-5.
34. Khan M, Coovadia YM, Connolly C, Sturm AW. Influence of sex on clinical features, laboratory findings, and complications of typhoid fever. *AmJ TropMed Hyg.* 1999;61(1):41-6.
35. Khan MA, Hayat Z, Sadick A. Ofloxacin in the treatment of typhoid fever resistant to chloramphenicol and amoxicillin. *ClinTher.* 1994;16(5):815-8.
36. Khosla SN. Typhoid hepatitis. *PostgradMed J.* 1990;66(781):923-5.
37. Khosla SN, Anand A, Singh U, Khosla A. Haematological profile in typhoid fever. *TropDoct.* 1995;25(4):156-8.
38. Khosla SN, Kalra IJ, Sharma A. Plasma cortisol levels in enteric fever. *J AssocPhysicians India.* 1989;37(10):643-5.
39. Khosla SN, Lochan R. Renal dysfunction in enteric fever. *J AssocPhysicians India.* 1991;39(5):382-4.
40. Khosla SN, Saman A, Khosla P, Sabharwal U, Khosla A. Drug resistant typhoid fever. *TropDoct.* 1998;28(4):235-7.

41. Khosla SN, Singh R, Singh GP, Trehan VK. The spectrum of hepatic injury in enteric fever. *AmJ Gastroenterol.* 1988;83(4):413-6.
42. Kuvandik C, Karaoglan I, Namiduru M, Baydar I. Predictive value of clinical and laboratory findings in the diagnosis of the enteric fever. *New Microbiol.* 2009 Jan;32(1):25-30.
43. Leung DT, Bogetz J, Itoh M, Ganapathi L, Pietroni MA, Ryan ET, et al. Factors associated with encephalopathy in patients with *Salmonella enterica* serotype Typhi bacteremia presenting to a diarrheal hospital in Dhaka, Bangladesh. *Am J Trop Med Hyg.* 2012 Apr;86(4):698-702
44. Liberti A, Loiacono L. Ciprofloxacin versus chloramphenicol in the treatment of salmonella infection. *Int J Antimicrob Agents.* 2000;16(3):347-8.
45. Lin FY, Becke JM, Groves C, Lim BP, Israel E, Becker EF, et al. Restaurant-associated outbreak of typhoid fever in Maryland: identification of carrier facilitated by measurement of serum Vi antibodies. *J Clin Microbiol.* 1988;26(6):1194-7.
46. Mathura KC, Chaudhary D, Simkhada R, Pradhan M, Shrestha P, Gurubacharya DL. Study of clinical profile and antibiotic sensitivity pattern in culture positive typhoid fever cases. *Kathmandu Univ Med J (KUMJ).* 2005;3(4):376-9.
47. Mathura KC, Gurubacharya DL, Shrestha A, Pant S, Basnet P, Karki DB. Clinical profile of typhoid patients. *Kathmandu Univ Med J (KUMJ).* 2003;1(2):135-7.
48. Misra RC, Kulpati DD, Bala S, Prakash K, Gupta SK, Chuttani HK. Niridazole-in treatment of typhoid fever. *Chemotherapy.* 1971;16(5):326-31.
49. Morgenstern R, Hayes PC. The liver in typhoid fever: always affected, not just a complication. *AmJ Gastroenterol.* 1991;86(9):1235-9.
50. Mukhtar ED, Mekki MO. Trimethoprim-sulphamethoxazole in the treatment of enteric fever in the Sudan. *TransRSocTropMed Hyg.* 1981;75(6):771-3.
51. Nand N, Sharma M, Bhutani M, Singh GP, Sharma VK. Cardiac status in typhoid fever. *Angiology.* 1996;47(11):1095-100.
52. Nazar HS, Rabbani A, Riaz A, Anwar J. Presentation of typhoid fever patients in Hazara Division and response to different treatment regimens. *J AyubMed CollAbbottabad.* 2005;17(1):67-9.
53. Ndububa DA, Erhabor GE, Akinola DO. Typhoid and paratyphoid fever: a retrospective study. *TropGastroenterol.* 1992;13(2):56-63.
54. Neopane A, Singh SB, Bhatta R, Dhital B, Karki DB. Changing spectrum of antibiotic sensitivity in enteric fever. *Kathmandu Univ Med J (KUMJ).* 2008 Jan-Mar;6(1):12-5.
55. Okome-Nkoumou M, Ayo NE, Bekale J, Kombila M. [Typhoid and paratyphoid fever in adults in the Internal Medicine Department at Libreville (Gabon)]. *Sante.* 2000;10(3):205-9.
56. Olle-Goig JE, Ruiz L. Typhoid fever in rural Haiti. *BullPan AmHealth Organ.* 1993;27(4):382-8.
57. Panhotra BR, Saxena AK, Al-Ghamdi AM. Typhoid fever due to multiresistant *Salmonella enterica* serovar typhi having reduced susceptibility to ciprofloxacin and nalidixic acid resistance. *SaudiMed J.* 2004;25(10):1509-11.
58. Park SC, Lee CH, Kim SY, Park CH, Kim TW, Seok SE, et al. Clinical trial of cefotaxime in patients with typhoid fever. *ClinTher.* 1985;7(4):448-51.
59. Pohan HT. Clinical and laboratory manifestations of typhoid fever at Persahabatan Hospital, Jakarta. *Acta Med Indones.* 2004;36(2):78-83.

60. Rogerson SJ, Spooner VJ, Smith TA, Richens J. Hydrocortisone in chloramphenicol-treated severe typhoid fever in Papua New Guinea. *TransRSocTropMed Hyg.* 1991;85(1):113-6.
61. Sanford JP, Linh NN, Kutscher E, Arnold K, Gould K. Oxolinic acid in the treatment of typhoid fever due to chloramphenicol-resistant strains of *Salmonella typhi*. *AntimicrobAgents Chemother.* 1976;9(3):387-92.
62. Sardesai HV, Melinkere RD, Diwate AB. Trimethoprim-sulphamethoxazole in typhoid fever. *TransRSocTropMed Hyg.* 1971;65(2):189-94.
63. Shin BM, Paik IK, Cho HI. Bone marrow pathology of culture proven typhoid fever. *J Korean Med Sci.* 1994;9(1):57-63.
64. Shlim DR, Schwartz E, Eaton M. Clinical Importance of *Salmonella Paratyphi A* Infection to Enteric Fever in Nepal. *JTravelMed.* 1995;2(3):165-8.
65. Smith SI, Odunukwe NN, Niemogha MT, Ahmed AO, Efiemokwu CA, Otuonye MN, et al. Diagnostic methods for typhoid fever in Nigeria. *BrJBiomedSci.* 2004;61(4):179-81.
66. Spencer DC, Pienaar NL, Atkinson PM. Disturbances of blood coagulation associated with *Salmonella typhi* infections. *J Infect.* 1988;16(2):153-61.
67. Su CP, Chen YC, Chang SC. Changing characteristics of typhoid fever in Taiwan. *J MicrobiolImmunolInfect.* 2004;37(2):109-14.
68. Sulaiman K, Sarwari AR. Culture-confirmed typhoid fever and pregnancy. *IntJInfectDis.* 2007;11(4):337-41.
69. Torin DE, Betts SL, McClenahan JB, Phillips GM, Shikamura MT. A typhoid fever outbreak on a university campus. *ArchInternMed.* 1969;124(5):606-10.
70. Trevett AJ, Nwokolo N, Lightfoot D, Naraq S, Kevau IH, Temu PI, et al. Ataxia in patients infected with *Salmonella typhi* phage type D2: clinical, biochemical and immunohistochemical studies. *TransRSocTropMed Hyg.* 1994;88(5):565-8.
71. Unal S, Hayran M, Tuncer S, Gur D, Uzun O, Akova M, et al. Treatment of enteric fever with pefloxacin for 7 days versus 5 days: a randomized clinical trial. *AntimicrobAgents Chemother.* 1996;40(12):2898-900.
72. Uwaydah AK, al SH, Matar I. Randomized prospective study comparing two dosage regimens of ciprofloxacin for the treatment of typhoid fever. *J AntimicrobChemother.* 1992;30(5):707-11.
73. Valenciano M, Baron S, Fisch A, Grimont F, Desenclos JC. Investigation of concurrent outbreaks of gastroenteritis and typhoid fever following a party on a floating restaurant, France, March 1998. *AmJEpidemiol.* 2000;152(10):934-9.
74. van den Bergh ET, Gasem MH, Keuter M, Dolmans MV. Outcome in three groups of patients with typhoid fever in Indonesia between 1948 and 1990. *TropMed Int Health.* 1999;4(3):211-5.
75. Walia M, Gaind R, Paul P, Mehta R, Aggarwal P, Kalaivani M. Age-related clinical and microbiological characteristics of enteric fever in India. *TransRSocTropMed Hyg.* 2006;100(10):942-8.
76. Walia M, Gaind R, Mehta R, Paul P, Aggarwal P, Kalaivani M. Current perspectives of enteric fever: a hospital-based study from India. *AnnTropPaediatr.* 2005;25(3):161-74.
77. Wang JL, Kao JH, Tseng SP, Teng LJ, Ho SW, Hsueh PR. Typhoid fever and typhoid hepatitis in Taiwan. *EpidemiolInfect.* 2005;133(6):1073-9.
78. Wallace MR, Yousif AA, Mahroos GA, Mapes T, Threlfall EJ, Rowe B, et al. Ciprofloxacin versus ceftriaxone in the treatment of multiresistant typhoid fever. *EurJ ClinMicrobiolInfectDis.* 1993;12(12):907-10.



79. Yap PK, Chua CT. The haemogram in the diagnosis of acute typhoid fever--with special reference to thrombocytopenia. Singapore Med J. 1983;24(3):161-2.

• **Table S4: Spectrum of enteric fever in children by economic regions and geographical regions**

| Demographics/History                                | High Income countries<br>17 studies |     |           | Europe& Central Asia<br>4 studies |     |           | Sub-Saharan Africa<br>12 studies |      |           | Middle East & North Africa<br>3 studies |     |           | South Asia<br>37 studies |      |           | East Asia & Pacific<br>10 studies |     |           |
|-----------------------------------------------------|-------------------------------------|-----|-----------|-----------------------------------|-----|-----------|----------------------------------|------|-----------|-----------------------------------------|-----|-----------|--------------------------|------|-----------|-----------------------------------|-----|-----------|
|                                                     | N                                   | N   | %         | n                                 | N   | %         | n                                | N    | %         | N                                       | N   | %         | n                        | N    | %         | n                                 | N   | %         |
| Males                                               | 262                                 | 472 | <b>56</b> | 77                                | 131 | <b>59</b> | 574                              | 1077 | <b>53</b> | 162                                     | 281 | <b>58</b> | 2626                     | 4512 | <b>58</b> | 371                               | 661 | <b>56</b> |
| Duration of illness 1-2weeks                        | 63                                  | 161 | <b>39</b> |                                   |     |           | 109                              | 420  | <b>26</b> | 40                                      | 150 | <b>27</b> | 556                      | 1712 | <b>32</b> | 63                                | 158 | <b>40</b> |
| Duration of illness > 2 weeks                       | 74                                  | 161 | <b>46</b> |                                   |     |           | 35                               | 320  | <b>11</b> | 18                                      | 150 | <b>12</b> | 432                      | 1863 | <b>23</b> | 5                                 | 158 | <b>3</b>  |
| Duration of illness > 1 week                        | 63                                  | 134 | <b>47</b> |                                   |     |           | 131                              | 424  | <b>31</b> |                                         |     |           | 672                      | 1380 | <b>49</b> | 122                               | 325 | <b>38</b> |
| Chloramphenicol resistance                          | 10                                  | 257 | <b>4</b>  | 2                                 | 83  | <b>2</b>  | 0                                | 120  | <b>0</b>  |                                         |     |           | 712                      | 1075 | <b>66</b> | 66                                | 426 | <b>15</b> |
| Ampicillin/Amoxycillin resistance                   | 19                                  | 245 | <b>8</b>  | 3                                 | 83  | <b>4</b>  | 6                                | 120  | <b>5</b>  |                                         |     |           | 506                      | 781  | <b>65</b> | 41                                | 329 | <b>12</b> |
| Co-trimoxazole resistance                           | 17                                  | 245 | <b>7</b>  | 2                                 | 83  | <b>2</b>  | 10                               | 181  | <b>6</b>  |                                         |     |           | 502                      | 708  | <b>71</b> | 29                                | 337 | <b>9</b>  |
| <b>Laboratory features</b>                          |                                     |     |           |                                   |     |           |                                  |      |           |                                         |     |           |                          |      |           |                                   |     |           |
| Severe anaemia (<7.5 g/dl)                          |                                     |     |           |                                   |     |           | 52                               | 152  | <b>34</b> | 3                                       | 62  | <b>5</b>  | 3                        | 50   | <b>6</b>  | 7                                 | 163 | <b>4</b>  |
| Neutrophilia(>7.5 x 10 <sup>3</sup> /μL)            |                                     |     |           | 21                                | 24  | <b>88</b> |                                  |      |           |                                         |     |           | 72                       | 131  | <b>55</b> | 116                               | 177 | <b>66</b> |
| Thrombocytopenia (<150 x 10 <sup>3</sup> /μL)       | 39                                  | 264 | <b>15</b> | 0                                 | 15  | <b>0</b>  | 92                               | 266  | <b>35</b> |                                         |     |           | 53                       | 1208 | <b>4</b>  | 47                                | 173 | <b>27</b> |
| Severe thrombocytopenia (<50 x 10 <sup>3</sup> /μL) |                                     |     |           |                                   |     |           | 4                                | 91   | <b>4</b>  | 1                                       | 71  | <b>1</b>  |                          |      |           | 5                                 | 17  | <b>29</b> |
| Hemolysis or hemolytic anaemia                      | 11                                  | 127 | <b>9</b>  | 1                                 | 27  | <b>4</b>  | 2                                | 144  | <b>1</b>  |                                         |     |           |                          |      |           | 7                                 | 279 | <b>3</b>  |
| <b>Other signs and symptoms</b>                     |                                     |     |           |                                   |     |           |                                  |      |           |                                         |     |           |                          |      |           |                                   |     |           |
| Chills or rigors                                    | 40                                  | 106 | <b>38</b> |                                   |     |           |                                  |      |           | 4                                       | 71  | <b>6</b>  | 154                      | 503  | <b>31</b> | 83                                | 638 | <b>13</b> |
| Anorexia/refusal to feed                            | 140                                 | 279 | <b>50</b> | 37                                | 72  | <b>51</b> | 73                               | 224  | <b>33</b> |                                         |     |           | 770                      | 3184 | <b>24</b> | 246                               | 502 | <b>49</b> |
| Weakness or malaise                                 | 58                                  | 61  | <b>95</b> | 23                                | 51  | <b>45</b> | 6                                | 217  | <b>3</b>  |                                         |     |           | 48                       | 161  | <b>30</b> | 9                                 | 30  | <b>30</b> |
| Continuous fever                                    |                                     |     |           |                                   |     |           | 3                                | 54   | <b>6</b>  | 31                                      | 150 | <b>21</b> | 262                      | 351  | <b>75</b> | 32                                | 137 | <b>23</b> |
| Intermittent fever                                  | 96                                  | 127 | <b>76</b> |                                   |     |           | 11                               | 35   | <b>31</b> | 5                                       | 150 | <b>3</b>  | 171                      | 354  | <b>48</b> | 52                                | 137 | <b>38</b> |
| Remittent fever                                     | 28                                  | 111 | <b>25</b> |                                   |     |           | 64                               | 231  | <b>28</b> | 114                                     | 150 | <b>76</b> | 29                       | 245  | <b>12</b> | 51                                | 137 | <b>37</b> |
| Stepladder fever                                    |                                     |     |           |                                   |     |           |                                  |      |           |                                         |     |           | 0                        | 93   | <b>0</b>  | 0                                 | 54  | <b>0</b>  |
| Chelosis                                            | 2                                   | 24  | <b>8</b>  |                                   |     |           |                                  |      |           |                                         |     |           | 33                       | 447  | <b>7</b>  | 4                                 | 137 | <b>3</b>  |
| URTI                                                | 31                                  | 111 | <b>28</b> |                                   |     |           | 11                               | 47   | <b>23</b> | 37                                      | 150 | <b>25</b> | 436                      | 2765 | <b>16</b> | 19                                | 314 | <b>6</b>  |
| <b>Other complications</b>                          |                                     |     |           |                                   |     |           |                                  |      |           |                                         |     |           |                          |      |           |                                   |     |           |
| Myocarditis                                         |                                     |     |           |                                   |     |           | 1                                | 107  | <b>1</b>  |                                         |     |           | 24                       | 908  | <b>3</b>  | 12                                | 397 | <b>3</b>  |
| Meningitis or meningismus                           | 18                                  | 326 | <b>6</b>  |                                   |     |           | 170                              | 957  | <b>18</b> | 12                                      | 221 | <b>5</b>  | 54                       | 1231 | <b>4</b>  | 9                                 | 488 | <b>2</b>  |
| Hepatitis or raised LFTs                            | 23                                  | 56  | <b>41</b> | 13                                | 43  | <b>30</b> | 13                               | 296  | <b>4</b>  |                                         |     |           | 199                      | 2427 | <b>8</b>  | 70                                | 173 | <b>40</b> |
| Jaundice                                            | 4                                   | 181 | <b>2</b>  | 3                                 | 51  | <b>6</b>  | 33                               | 569  | <b>6</b>  |                                         |     |           | 109                      | 3485 | <b>3</b>  | 12                                | 538 | <b>2</b>  |
| DIC                                                 |                                     |     |           |                                   |     |           |                                  |      |           |                                         |     |           | 91                       | 336  | <b>27</b> | 1                                 | 54  | <b>2</b>  |
| Acute acalculouscholecystitis                       | 1                                   | 28  | <b>4</b>  |                                   |     |           |                                  |      |           |                                         |     |           | 39                       | 970  | <b>4</b>  | 4                                 | 156 | <b>3</b>  |
| Edema/pleural effusion/ascites                      | 8                                   | 83  | <b>10</b> |                                   |     |           | 4                                | 117  | <b>3</b>  |                                         |     |           | 14                       | 674  | <b>2</b>  | 6                                 | 193 | <b>3</b>  |
| Convulsions                                         | 2                                   | 58  | <b>3</b>  | 3                                 | 27  | <b>11</b> | 7                                | 324  | <b>2</b>  |                                         |     |           | 22                       | 590  | <b>4</b>  | 4                                 | 30  | <b>13</b> |
| Focal neurological involvement                      | 4                                   | 153 | <b>3</b>  | 3                                 | 51  | <b>6</b>  | 11                               | 385  | <b>3</b>  | 5                                       | 71  | <b>7</b>  | 65                       | 2249 | <b>3</b>  | 17                                | 458 | <b>4</b>  |
| Epistaxis/bleeding(unspecified)                     | 24                                  | 240 | <b>10</b> |                                   |     |           | 3                                | 117  | <b>3</b>  |                                         |     |           | 33                       | 772  | <b>4</b>  | 16                                | 242 | <b>7</b>  |
| Any abscess                                         | 1                                   | 50  | <b>2</b>  |                                   |     |           | 3                                | 164  | <b>2</b>  |                                         |     |           | 2                        | 488  | <b>0</b>  |                                   |     |           |

|                                    |    |     |    |    |    |    |     |     |    |    |    |     |     |      |     |     |     |   |
|------------------------------------|----|-----|----|----|----|----|-----|-----|----|----|----|-----|-----|------|-----|-----|-----|---|
| Osteomyelitis or septic arthritis  | 1  | 206 | 0  |    |    | 10 | 184 | 5   |    |    | 2  | 625 | 0   | 2    | 102 | 2   |     |   |
| Renal involvement                  | 4  | 16  | 25 |    |    | 59 | 974 | 6   | 20 | 71 | 28 | 8   | 823 | 1    | 46  | 116 | 40  |   |
| Arthritis or arthralgia or myalgia | 24 | 152 | 16 | 40 | 96 | 42 | 17  | 271 | 6  | 2  | 71 | 3   | 60  | 1182 | 5   | 16  | 384 | 4 |

**Table S5: Spectrum of enteric fever in children in Latin America & Caribbean**

|                                           | Latin America & Caribbean<br>2 studies |    |     |
|-------------------------------------------|----------------------------------------|----|-----|
|                                           | n                                      | N  | %   |
| Males                                     | 8                                      | 13 | 62  |
| Blood/bone marrow Isolates                | 13                                     | 13 | 100 |
| Duration of illness ≤ 1 week              | 4                                      | 4  | 100 |
| Fever                                     | 4                                      | 4  | 100 |
| High grade fever                          | 0                                      | 4  | 0   |
| Anorexia/refusal to feed                  | 2                                      | 4  | 50  |
| Cough                                     | 4                                      | 4  | 100 |
| Nausea or vomiting                        | 2                                      | 4  | 50  |
| Diarrhea                                  | 0                                      | 4  | 0   |
| Constipation                              | 0                                      | 4  | 0   |
| Hepatomegaly                              | 0                                      | 4  | 0   |
| Splenomegaly                              | 0                                      | 4  | 0   |
| Anaemia (Hb < 12 g/dl)                    | 9                                      | 9  | 100 |
| Neutrophilia (>7.5 x 10 <sup>3</sup> /μL) | 9                                      | 9  | 100 |
| Meningitis or meningismus                 | 1                                      | 9  | 11  |
| Pneumonia or chest signs                  | 1                                      | 9  | 11  |
| Hepatitis or raised LFTs                  | 2                                      | 9  | 22  |
| Epistaxis/bleeding                        | 4                                      | 9  | 44  |
| Death                                     | 2                                      | 13 | 15  |

- Table S6: Associations of clinical features in enteric fever by geographical regions (Africa\* versus South Asia)

| Clinical Features                      | Odds Ratio | 95% Confidence Interval |
|----------------------------------------|------------|-------------------------|
| Multi-drug resistant isolate           | 0.6        | 0.5 - 0.8               |
| Toxicity                               | 2.2        | 1.8 - 2.7               |
| Diarrhea                               | 2.3        | 2.0 - 2.6               |
| Constipation                           | 3.3        | 2.4 - 4.5               |
| Relative bradycardia                   | 15.3       | 9.6 - 24.3              |
| Leucopenia (< 5 x 10 <sup>3</sup> /μL) | 2.8        | 2.1 - 3.6               |
| Leucocytosis (> 15)                    | 0.6        | 0.4 - 0.9               |
| Thrombocytopenia                       | 11.5       | 7.9 - 16.7              |
| Abdominal pain/tenderness              | 2.4        | 2.1 - 2.8               |
| Abdominal distention or ileus          | 7.4        | 6.2 - 8.9               |
| Altered mental status                  | 1.5        | 1.2 - 1.8               |
| Meningitis or meningismus              | 4.1        | 3.0 - 5.5               |
| Pneumonia                              | 3.1        | 2.6 - 3.8               |
| GI bleeding                            | 0.5        | 0.3 - 0.8               |
| Death                                  | 3.6        | 2.7 - 4.9               |
| Severe anaemia (<7.5)                  | 5.4        | 1.6 - 18.1              |
| URTI                                   | 1.7        | 1.2 - 2.3               |

|                                   |      |            |
|-----------------------------------|------|------------|
| Duration of illness > 2 weeks     | 0.4  | 0.3 - 0.6  |
| Duration of illness > 1 week      | 0.8  | 0.6 - 1.0  |
| Chills or rigors                  | 0.2  | 0.1 - 0.6  |
| Anorexia/refusal to feed          | 1.5  | 1.1 - 2.0  |
| Weakness or malaise               | 0.07 | 0.03 - 0.2 |
| Continuous fever                  | 0.07 | 0.04 - 0.1 |
| Remittent fever                   | 6.5  | 4.2- 10.1  |
| Intermittent fever                | 0.1  | 0.06 - 0.2 |
| Hepatitis or raised LFTs          | 0.5  | 0.3 - 0.9  |
| Jaundice                          | 1.9  | 1.3- 2.9   |
| Osteomyelitis or septic arthritis | 17.9 | 3.9 - 82.5 |
| Renal involvement                 | 7.8  | 4.0 - 15.1 |

\* Sub-Saharan Africa (12 studies) and Middle East & North Africa (3 studies)

### **References to Table 2, Table S4, Table S5 and Table S6: Spectrum of enteric fever in children by economic regions**

#### High Income Countries

1. Chiu CH, Lin TY. Typhoid fever in children. *Lancet*. 1999;354(9194):2001-2.
2. Chiu CH, Tsai JR, Ou JT, Lin TY. Typhoid fever in children: a fourteen-year experience. *Acta PaediatrTaiwan*. 2000;41(1):28-32.
3. Chow CB, Wang PS, Leung NK. Typhoid fever in Hong Kong children. *AustPaediatrJ*. 1989;25(3):147-50.
4. Collins RN, Marine WM, Nahmias AJ. The 1964 epidemic of typhoid fever in Atlanta. Clinical and epidemiologic observations. *JAMA*. 1966;197(3):179-84.
5. Colon AR, Gross DR, Tamer MA. Typhoid fever in children. *Pediatrics*. 1975;56(4):606-9.
6. Colon AR. Gastrointestinal phenomena in childhood typhoid fever. *SouthMed J*. 1976;69(7):914.
7. Daoud AS, Zaki M, Pugh RN, al-Mutairi G, Beseiso R, Nasrallah AY. Clinical presentation of enteric fever: its changing pattern in Kuwait. *J TropMed Hyg*. 1991;94(5):341-7
8. Del Rosario AJ, Haynes RE, Cramblett HG. Typhoid fever in children. *OhioState Med J*. 1971;67(6):516-20.
9. Galloway H, Clark NS, Blackhall M. Paediatric aspects of the Aberdeen typhoid outbreak. *ArchDisChild*. 1966;41(215):63-8.
10. Hardy G, Padfield CJ, Chadwick P, Partington MW. Typhoid outbreak in Kingston, Ont: experience with high-dose oral ampicillin. *CanMed AssocJ*. 1977;116(7):761-4, 7.
11. Ispahani P, Slack RC. Enteric fever and other extraintestinal salmonellosis in University Hospital, Nottingham, UK, between 1980 and 1997. *EurJ ClinMicrobiolInfectDis*. 2000;19(9):679-87.
12. Mallouh AA, Sa'di AR. White blood cells and bone marrow in typhoid fever. *Pediatr InfectDisJ*. 1987;6(6):527-9.

13. Misra S, Diaz PS, Rowley AH. Characteristics of typhoid fever in children and adolescents in a major metropolitan area in the United States. *ClinInfectDis*. 1997;24(5):998-1000.
14. Oh HM, Masayu Z, Chew SK. Typhoid fever in hospitalized children in Singapore. *J Infect*. 1997;34(3):237-42.
15. Papaevangelou V, Syriopoulou V, Charissiadou A, Pangalis A, Mostrou G, Theodoridou M. Salmonella bacteraemia in a tertiary children's hospital. *ScandJ InfectDis*. 2004;36(8):547-51.
16. Stormon MO, McIntyre PB, Morris J, Fasher B. Typhoid fever in children: diagnostic and therapeutic difficulties. *Pediatr InfectDisJ*. 1997;16(7):713-4.
17. Su CP, Chen YC, Chang SC. Changing characteristics of typhoid fever in Taiwan. *J MicrobiolImmunolInfect*. 2004;37(2):109-14.
18. Tolaymat A, Fakhreddine F, David CB, Whitworth JM. Typhoid fever in children: a forgotten disease? *SouthMed J*. 1979;72(2):136-8.
19. Wang JL, Kao JH, Tseng SP, Teng LJ, Ho SW, Hsueh PR. Typhoid fever and typhoid hepatitis in Taiwan. *EpidemiolInfect*. 2005;133(6):1073-9.

#### Sub Saharan Africa:

1. Ali Omer MI. Trimethoprim-sulphamethoxazole in the treatment of enteric fever. *JTropMedHyg*. 1975;78(7):162-6.
2. Duggan MB, Beyer L. Enteric fever in young Yoruba children. *ArchDisChild*. 1975;50(1):67-71
3. Ellis ME, Moosa A, Hillier V. A review of typhoid fever in South African black children. *PostgradMed J*. 1990;66(782):1032-6
4. Green SD, Cheesbrough JS. Salmonella bacteraemia among young children at a rural hospital in western Zaire. *AnnTropPaediatr*. 1993;13(1):45-53.
5. Johnson AO, Aderele WI. Enteric fever in childhood. *J TropMed Hyg*. 1981;84(1):29-35.
6. Kagwa-Nyanzi JA. Typhoid fever in African children. *J TropPediatr EnvironChild Health*. 1971;17(3):105-9.
7. Khan M, Coovadia YM, Connolly C, Sturm AW. Influence of sex on clinical features, laboratory findings, and complications of typhoid fever. *AmJ TropMed Hyg*. 1999;61(1):41-6.
8. Laditan AA, Alausa KO. Problems in the clinical diagnosis of typhoid fever in children in the tropics. *AnnTropPaediatr*. 1981;1(3):191-5.
9. Lepage P, Bogaerts J, Van GC, Ntahurutaba M, Nsengumuremyi F, Hitimana DG, et al. Community-acquired bacteraemia in African children. *Lancet*. 1987;1(8548):1458-61
10. Mtove G, Amos B, von Seidlein L, Hendriksen I, Mwambuli A, Kimera J, et al. Invasive salmonellosis among children admitted to a rural Tanzanian hospital and a comparison with previous studies. *PLoS One*. 2010;5(2):e9244.
11. Mulligan TO. Typhoid fever in young children. *BrMed J*. 1971;4(5788):665-7
12. Nesbitt A, Mirza NB. Salmonella septicaemias in Kenyan children. *J TropPediatr*. 1989;35(1):35-9
13. Scragg JN, Rubidge CJ. Trimethoprim and sulphamethoxazole in typhoid fever in children. *BrMed J*. 1971;3(5777):738-41.
14. Topley JM. Mild typhoid fever. *ArchDisChild*. 1986;61(2):164-7.

#### East Asia and Pacific:

1. Brian MJ. Typhoid in children in Goroka. PNGMed J. 1990;33(1):68-9.
  2. Choo KE, Razif A, Ariffin WA, Sepiah M, Gururaj A. Typhoid fever in hospitalized children in Kelantan, Malaysia. AnnTropPaediatr. 1988;8(4):207-12.
  3. Emary K, Moore CE, Chanpheaktra N, An KP, Chheng K, Sona S, et al. Enteric fever in Cambodian children is dominated by multidrug-resistant H58 Salmonella enterica serovar Typhi with intermediate susceptibility to ciprofloxacin. Trans R Soc Trop Med Hyg. 2012 Dec;106(12):718-24.
  4. Hoa NT, Diep TS, Wain J, Parry CM, Hien TT, Smith MD, et al. Community-acquired septicaemia in southern Viet Nam: the importance of multidrug-resistant Salmonella typhi.
  5. Malik AS, Malik RH. Typhoid fever in Malaysian children. Med J Malaysia. 2001;56(4):478-90.
  6. Malik AS. Complications of bacteriologically confirmed typhoid fever in children. J TropPediater. 2002;48(2):102-8
  7. Soelistyowati S, Soenarto Y, Soesilo H, Widiarto, Widiatmodjo, Ismangoen. Typhoid fever in children. Paediatr Indones. 1982;22(7-8):138-46.
  8. Shwe TN, Nyein MM, Yi W, Mon A. Blood culture isolates from children admitted to Medical Unit III, Yangon Children's Hospital, 1998. Southeast Asian J TropMed
  9. Thisyakorn U, Mansuwan P, Taylor DN. Typhoid and paratyphoid fever in 192 hospitalized children in Thailand. AmJ DisChild. 1987;141(8):862-5
  10. Thisyakorn U, Mansuwan P. Comparative efficacy of mecillinam, mecillinam/amoxicillin and trimethoprim-sulfamethoxazole for treatment of typhoid fever in children. PediatrInfectDisJ.
  11. Wongsawat J, Pancharoen C, Thisyakorn U. Typhoid fever in children: experience in King Chulalongkorn Memorial Hospital. J Med AssocThai. 2002;85
  12. Yap YF, Puthuchery SD. Typhoid fever in children--a retrospective study of 54 cases from Malaysia. Singapore Med J. 1998;39(6):260-2.
- Europe and Central Asia:
1. Caglar MK, Ozsoylu S, Kanra G. Relative granulocytosis in childhood typhoid fever. J Pediatr. 1983;102(4):603-4
  2. Ciftci E, Guriz H, Derya AA, Ince E, Erdem B, Dogru U. Salmonella bacteraemia in Turkish children: 37 cases seen in a university hospital between 1993 and 2002.
  3. Kanra G, Yurdakok M, Secmeer G, Arvas A, Dereli O, Sarikayalar F, et al. Clinical findings of pediatric patients during an outbreak of typhoid fever in Ankara. TurkJ
  4. Secmeer G, Kanra G, Cemeroglu AP, Ozen H, Ceyhan M, Ecevit Z. Salmonella typhi infections. A 10-year retrospective study. TurkJ Pediatr. 1995;37(4):339-41.
  5. Tatli MM, Aktas G, Kosecik M, Yilmaz A. Treatment of typhoid fever in children with a flexible-duration of ceftriaxone, compared with 14-day treatment with chloramphenicol.
- Latin America:
1. Ferreccio C, Levine MM, Manterola A, Rodriguez G, Rivara I, Prenzel I, et al. Benign bacteremia caused by Salmonella typhi and paratyphi in children younger than 2
  2. Palacios Malmaceda PG, Vela Acosta JJ, Gutierrez AW. [Typhoid fever in children under 2 years of age]. BolMedHospInfant Mex. 1981;38(3):473-83
- Middle East and North Africa:

1. Girgis NI, Tribble DR, Sultan Y, Farid Z. Short course chemotherapy with cefixime in children with multidrug-resistant *Salmonella typhi* Septicaemia. *J Trop Pediatr*. 1995;41(6):364-5
2. Khuri-Bulos N. Enteric fevers in children. The importance of age in the varying clinical picture. *Clin Pediatr (Phila)*. 1981;20(7):448-52.
3. Moussa K. Enterica of childhood. *J Egypt Public Health Assoc*. 1970;45(1):48-55.

#### South Asia:

1. Agarwal KS, Singh SK, Kumar N, Srivastav R, Rajkumar A. A study of current trends in enteric fever. *J Commun Dis*. 1998;30(3):171-4.
2. Ahmad KA, Khan LH, Roshan B, Bhutta ZA. Factors associated with typhoid relapse in the era of multiple drug resistant strains. *J Infect Dev Ctries*. 2011 Oct;5(10):727-31.
3. Arora RK, Gupta A, Joshi NM, Kataria VK, Lall P, Anand AC. Multidrug resistant typhoid fever: study of an outbreak in Calcutta. *Indian Pediatr*. 1992;29(1):61-6.
4. Bhutta ZA. Impact of age and drug resistance on mortality in typhoid fever. *Arch Dis Child*. 1996;75(3):214-7.
5. Bhutta ZA. Fulminant hepatic failure with typhoid fever in childhood. *J Pak Med Assoc*. 1991;41(6):123-6.
6. Bhutta ZA, Mansoorali N, Hussain R. Plasma cytokines in paediatric typhoidal salmonellosis: correlation with clinical course and outcome. *J Infect*. 1997;35(3):253-6.
7. Bhutta ZA, Naqvi SH. Hepatic dysfunction in paediatric typhoidal salmonellosis. *Ann Trop Paediatr*. 1991;11(3):203-5.
8. Bhutta ZA, Naqvi SH, Durrani S, Suria A. Chloramphenicol therapy of typhoid fever and its relationship to hepatic dysfunction. *J Trop Pediatr*. 1991;37(6):320-2.
9. Bhutta ZA, Naqvi SH, Razzaq RA, Farooqui BJ. Multidrug-resistant typhoid in children: presentation and clinical features. *Rev Infect Dis*. 1991;13(5):832-6.
10. Bhutta ZA, Niazi SK, Suria A. Chloramphenicol clearance in typhoid fever: implications for therapy. *Indian J Pediatr*. 1992;59(2):213-9
11. Bhutta ZA. Enteric Fever: Risk Factors for Treatment Failure in the Era of Multidrug Resistance. UNPUBLISHED.
12. Biswal N. Neurological manifestations of typhoid fever in children. *J Trop Pediatr*. 1994;40(3):190.
13. Biswal N, Mathai B, Bhatia BD, Srinivasan S, Nalini P. Enteric fever: a changing perspective. *Indian Pediatr*. 1994;31(7):813-9.
14. Buch NA, Hassan MU, Kakroo DK. Enteric fever--a changing sensitivity pattern, clinical profile and outcome. *Indian Pediatr*. 1994;31(8):981-5
15. Chandra R, Srinivasan S, Nalini P, Rao RS. Multidrug resistant enteric fever. *J Trop Med Hyg*. 1992;95(4):284-7.
16. Chawla V, Bhujwala RA, Chandra RK, Ghai OP. Typhoid fever in children. Clinical and bacteriological studies. *Indian J Pediatr*. 1970;37(269):239-44.
17. Dheer G, Kundra S, Singh T. Clinical and laboratory profile of enteric fever in children in northern India. *Trop Doct*. 2012 Jul;42(3):154-6.
18. Dutta P, Lahiri M, Bhattacharya SK, Saha MR, Mitra U, Rasaily R, et al. Hepatitis-like presentation in typhoid fever. *Trans R Soc Trop Med Hyg*. 1992;86(1):92.

19. Dutta P, Rasaily R, Saha MR, Mitra U, Manna B, Chakraborty S, et al. Randomized clinical trial of furazolidone for typhoid fever in children. *ScandJGastroenterol*. 1993;28(2):168-72.
20. Garg K, Mangal N, Mathur HC. Clinical profile of multi drug resistant typhoid fever in Jaipur City. *Indian Pediatr*. 1994;31(2):191-3.
21. Garg RA, Krashak R. Typhoid fever before two years of age. *Indian Pediatr*. 1993;30(6):805-8
22. Gulati S, Marwaha RK, Singhi S, Ayyagari A, Kumar L. Third generation cephalosporins in multi-drug resistant typhoid fever. *Indian Pediatr*. 1992;29(4):513-6.
23. Hassan M. Multiply-resistant *Salmonella typhi* in children. *Drugs*. 1995;49 Suppl 2:457-9.
24. Jagadish K, Patwari AK, Sarin SK, Prakash C, Srivastava DK, Anand VK. Hepatic manifestations in typhoid fever. *Indian Pediatr*. 1994;31(7):807-11.
25. Jain S, Chitnis DS, Sham A, Rathi S, Inamdar S, Rindani GJ. Outbreak of chloramphenicol resistant typhoid fever. *Indian Pediatr*. 1987;24(3):193-7
26. Kabra SK, Madhulika, Talati A, Soni N, Patel S, Modi RR. Multidrug-resistant typhoid fever. *TropDoct*. 2000;30(4):195-7.
27. Kapoor JP, Mohan M, Talwar V, Daral TS, Bhargava SK. Typhoid fever in young children. *Indian Pediatr*. 1985;22(11):811-3.
28. Khan MI, Soofi SB, Ochiai RL, Khan MJ, Sahito SM, Habib MA, et al. Epidemiology, clinical presentation, and patterns of drug resistance of *Salmonella Typhi* in Karachi, Pakistan. *J Infect Dev Ctries*. 2012 Oct;6(10):704-14.
29. Koul PB, Murali MV, Sharma PP, Ghai OP, Ramchandran VG, Talwar V. Multi drug resistant *Salmonella typhi* infection: clinical profile and therapy. *Indian Pediatr*. 1991;28(4):357-61.
30. Kulkarni ML, Rego SJ. Acute acalculous cholecystitis in typhoid fever. *Indian Pediatr*. 1995;32(7):829-30
31. Kumar R, Gupta N. Multidrug-resistant typhoid fever. *Indian J Pediatr*. 2007;74(1):39-42.
32. Leung DT, Bogetz J, Itoh M, Ganapathi L, Pietroni MA, Ryan ET, et al. Factors associated with encephalopathy in patients with *Salmonella enterica* serotype Typhi bacteremia presenting to a diarrheal hospital in Dhaka, Bangladesh. *Am J Trop Med Hyg*. 2012 Apr;86(4):698-702
33. Libov A. Enteric fever in children. *Indian JPediatr*. 1960;27:125-8. Mishra S, Patwari AK, Anand VK, Pillai PK, Aneja S, Chandra J, et al. A clinical profile of multidrug resistant typhoid fever. *Indian Pediatr*. 1991;28(10):1171-4.
34. Memon IA, Billoo AG, Memon HI. Cefixime: an oral option for the treatment of multidrug-resistant enteric fever in children. *SouthMed J*. 1997;90(12):1204-7.
35. Mishra S, Patwari AK, Anand VK, Pillai PK, Aneja S, Chandra J, et al. A clinical profile of multidrug resistant typhoid fever. *Indian Pediatr*. 1991;28(10):1171-4.
36. Naemullah S. A 3 year study of children with enteric fever. *Pakistan Pediatric Journal*. 1994;18(4):165-9.
37. Owais A, Sultana S, Zaman U, Rizvi A, Zaidi AK. Incidence of typhoid bacteremia in infants and young children in southern coastal Pakistan. *Pediatr Infect Dis J*. 2010 Nov;29(11):1035-9.
38. Pradhan R, Shrestha U, Gautam SC, Thorson S, Shrestha K, Yadav BK, et al. Bloodstream infection among children presenting to a general hospital outpatient clinic in urban Nepal. *PLoS One*. 2012;7(10):e47531

39. Rajajee S, Anandi TB, Subha S, Vatsala BR. Patterns of resistant Salmonella typhi infection in infants. *JTropPediater*. 1995;41(1):52-4.
40. Raman TS, Krishnamurthy L, Menon PK, Singh D, Jayaprakash DG. Clinical profile and therapy in enteric fever. *Indian Pediatr*. 1994;31(2):196-9.
41. Ramanan A, Pandit N, Yeshwanth M. Unusual complications in a multidrug resistant Salmonella typhi outbreak. *Indian Pediatr*. 1992;29(1):118-20.
42. Rasaily R, Dutta P, Saha MR, Mitra U, Lahiri M, Pal SC. Multi-drug resistant typhoid fever in hospitalised children. Clinical, bacteriological and epidemiological profiles.
43. Rathore MH, Bux D, Hasan M. Multidrug-resistant Salmonella typhi in Pakistani children: clinical features and treatment. *SouthMed J*. 1996;89(2):235-7.
44. Sethuraman S, Mahamood M, Kareem S. Furazolidone in multi-resistant childhood typhoid fever. *AnnTropPaediatr*. 1994;14(4):321-4.
45. Sharma A, Gathwala G. Clinical profile and outcome in enteric fever. *Indian Pediatr*. 1993;30(1):47-50.
46. Shetty AK, Mital SR, Bahrainwala AH, Khubchandani RP, Kumta NB. Typhoid hepatitis in children. *J TropPediater*. 1999;45(5):287-90.
47. Siddiqui FJ, Rabbani F, Hasan R, Nizami SQ, Bhutta ZA. Typhoid fever in children: some epidemiological considerations from Karachi, Pakistan. *Int J*
48. Singh H, Raizada N. Chloramphenicol resistant typhoid fever. *Indian Pediatr*. 1991;28(4):433.
49. Sinha A, Sazawal S, Kumar R, Sood S, Reddaiah VP, Singh B, et al. Typhoid fever in children aged less than 5 years. *Lancet*. 1999;354(9180):734-7.
50. Smith M. Typhoid admissions in childhood. *TropDoct*. 1986;16(4):150-2
51. Takkar VP, Kumar R, Takkar R, Khurana S. Resurgence of chloramphenicol sensitive Salmonella typhi. *Indian Pediatr*. 1995;32(5):586-7.
52. Thambidorai CR, Shyamala J, Sarala R, Vatsala RB, Tamizhisai S. Acute acalculous cholecystitis associated with enteric fever in children. *Pediatr Infect Dis J*. 1995 Sep;14(9):812-3.
53. Verma PS, Mullick P, Ghosh S. Neurological manifestations of enteric fever: clinical profile and correlation with ultimate outcome. *Indian Pediatr*. 1972;9(11):681-5.
54. Walia M, Gaiind R, Mehta R, Paul P, Aggarwal P, Kalaivani M. Current perspectives of enteric fever: a hospital-based study from India. *AnnTropPaediatr*. 2005;25(3):161-74.
55. Mishra S, Patwari AK, Anand VK, Pillai PK, Aneja S, Chandra J, et al. A clinical profile of multidrug resistant typhoid fever. *Indian Pediatr*. 1991;28(10):1171-4.

- Table S7: Enteric fever in children in hospital-based versus community-based setting

| Demographics/History                | Hospital-based<br>80 studies |      |    | Community-based<br>or health center (out-<br>patients)<br>5 studies |   |    |
|-------------------------------------|------------------------------|------|----|---------------------------------------------------------------------|---|----|
|                                     | N                            | N    | %  | n                                                                   | N | %  |
| Males                               | 4075                         | 7142 | 57 | 2                                                                   | 4 | 50 |
| Duration of illness within 1-2weeks | 831                          | 2601 | 32 |                                                                     |   |    |



|                                                     |      |      |           |    |    |           |
|-----------------------------------------------------|------|------|-----------|----|----|-----------|
| Duration of illness > 2 weeks                       | 564  | 2652 | <b>21</b> |    |    |           |
| Duration of illness > 1 week                        | 988  | 2263 | <b>44</b> |    |    |           |
| Chloramphenicol resistance                          | 780  | 1895 | <b>41</b> | 10 | 28 | <b>36</b> |
| Ampicillin/Amoxicillin resistance                   | 567  | 1520 | <b>37</b> |    |    |           |
| Co-trimoxazole resistance                           | 547  | 1516 | <b>36</b> |    |    |           |
| <b>Laboratory features</b>                          |      |      |           |    |    |           |
| Severe anaemia (<7.5 g/dl)                          | 53   | 393  | <b>13</b> |    |    |           |
| Neutrophilia(>7.5 x 10 <sup>3</sup> /μL)            | 218  | 341  | <b>64</b> |    |    |           |
| Thrombocytopenia (<150 x 10 <sup>3</sup> /μL)       | 231  | 1926 | <b>12</b> |    |    |           |
| Severe thrombocytopenia (<50 x 10 <sup>3</sup> /μL) | 10   | 179  | <b>6</b>  |    |    |           |
| Hemolysis or hemolytic anaemia                      | 21   | 577  | <b>4</b>  |    |    |           |
| <b>Other signs and symptoms</b>                     |      |      |           |    |    |           |
| Chills or rigors                                    | 281  | 1318 | <b>21</b> |    |    |           |
| Anorexia/refusal to feed                            | 1264 | 4212 | <b>30</b> | 4  | 53 | <b>8</b>  |
| Weakness/dizziness or malaise                       | 142  | 471  | <b>30</b> | 2  | 49 | <b>4</b>  |
| Continuous fever                                    | 328  | 692  | <b>47</b> |    |    |           |
| Intermittent fever                                  | 335  | 803  | <b>42</b> |    |    |           |
| Remittent fever                                     | 286  | 874  | <b>33</b> |    |    |           |
| Stepladder fever                                    | 0    | 147  | <b>0</b>  |    |    |           |
| Chelosis                                            | 39   | 608  | <b>6</b>  |    |    |           |
| URTI                                                | 532  | 3371 | <b>16</b> | 2  | 16 | <b>13</b> |
| <b>Other complications</b>                          |      |      |           |    |    |           |
| Myocarditis                                         | 37   | 1412 | <b>3</b>  |    |    |           |
| Meningitis or meningismus                           | 260  | 3160 | <b>8</b>  |    |    |           |
| Hepatitis or raised LFTs                            | 320  | 3004 | <b>11</b> |    |    |           |
| Jaundice                                            | 156  | 4790 | <b>3</b>  |    |    |           |
| DIC                                                 | 92   | 390  | <b>24</b> |    |    |           |
| Acute acalculouscholecystitis                       | 44   | 1154 | <b>4</b>  |    |    |           |
| Edema or pleural effusion or ascites                | 32   | 1067 | <b>3</b>  |    |    |           |
| Convulsions                                         | 103  | 3329 | <b>3</b>  |    |    |           |
| Focal neurological involvement                      | 38   | 1029 | <b>4</b>  |    |    |           |
| Epistaxis/bleeding (unspecified)                    | 79   | 1342 | <b>6</b>  |    |    |           |
| Any abscess                                         | 6    | 702  | <b>1</b>  |    |    |           |
| Osteomyelitis or septic arthritis                   | 11   | 1083 | <b>1</b>  |    |    |           |
| Renal involvement                                   | 137  | 2000 | <b>7</b>  |    |    |           |
| Arthritis or arthralgia or myalgia                  | 159  | 2156 | <b>7</b>  |    |    |           |

- Table S8: Associations of clinical features in enteric fever in children by setting (hospital-based versus community/health-center)

| Clinical Features                  | Odds Ratio | 95% Confidence Interval |
|------------------------------------|------------|-------------------------|
| Pre-treatment antibiotics received | 2.8        | 2.0 - 4.0               |
| Multidrug resistant isolates       | 1.7        | 1.3 - 2.1               |
| High - grade fever                 | 4.7        | 3.5 - 6.4               |
| Headache                           | 0.3        | 0.2 - 0.4               |
| Toxicity                           | 0.3        | 0.1 - 0.6               |
| Nausea/vomiting                    | 2.0        | 1.6 - 2.6               |
| Cough                              | 0.7        | 0.5 - 0.9               |
| Diarrhea                           | 5.2        | 3.8 - 7.2               |

|                                  |      |             |
|----------------------------------|------|-------------|
| Constipation                     | 4.2  | 1.9 - 9.6   |
| Hepatomegaly                     | 7.1  | 4.2 - 12.0  |
| Splenomegaly                     | 2.7  | 1.7 - 4.1   |
| Abdominal pain/tenderness        | 0.5  | 0.4 - 0.6   |
| Abdominal distention or ileus    | 7.4  | 2.7 - 20.0  |
| GI bleeding                      | 9.0  | 1.2 - 64.3  |
| Duration of illness $\leq$ 1week | 1.8  | 1.3 - 2.4   |
| Fluoroquinolone resistance       | 0.03 | 0.01 - 0.08 |

**References for Table 3 , Table S7, and Table S8: Typhoid fever in children in hospital-based vs. community/health-center**

Community Based:

1. Ferreccio C, Levine MM, Manterola A, Rodriguez G, Rivara I, Prenzel I, et al. Benign bacteremia caused by Salmonella typhi and paratyphi in children younger than 2 years. *J Pediatr.* 1984;104(6):899-901.
2. Khan MI, Soofi SB, Ochiai RL, Khan MJ, Sahito SM, Habib MA, et al. Epidemiology, clinical presentation, and patterns of drug resistance of Salmonella Typhi in Karachi, Pakistan. *J Infect Dev Ctries.* 2012 Oct;6(10):704-14.
3. Owais A, Sultana S, Zaman U, Rizvi A, Zaidi AK. Incidence of typhoid bacteremia in infants and young children in southern coastal Pakistan. *Pediatr Infect Dis J.* 2010
4. Pradhan R, Shrestha U, Gautam SC, Thorson S, Shrestha K, Yadav BK, et al. Bloodstream infection among children presenting to a general hospital outpatient clinic in urban Nepal. *PLoS One.* 2012;7(10):e47531
5. Sinha A, Sazawal S, Kumar R, Sood S, Reddaiah VP, Singh B, et al. Typhoid fever in children aged less than 5 years. *Lancet.* 1999;354(9180):734-7.
6. Siddiqui FJ, Rabbani F, Hasan R, Nizami SQ, Bhutta ZA. Typhoid fever in children: some epidemiological considerations from Karachi, Pakistan. *Int J Infect Dis.* 2006;10(3):215-22.

Hospital Based:

1. Ali Omer MI. Trimethoprim-sulphamethoxazole in the treatment of enteric fever. *J Trop Med Hyg.* 1975;78(7):162-6.
2. Ahmad KA, Khan LH, Roshan B, Bhutta ZA. Factors associated with typhoid relapse in the era of multiple drug resistant strains. *J Infect Dev Ctries.* 2011 Oct;5(10):727-31.
3. Arora RK, Gupta A, Joshi NM, Kataria VK, Lall P, Anand AC. Multidrug resistant typhoid fever: study of an outbreak in Calcutta. *Indian Pediatr.* 1992;29(1):61-6.
4. Bhutta ZA. Impact of age and drug resistance on mortality in typhoid fever. *ArchDisChild.* 1996;75(3):214-7.
5. Bhutta ZA. Fulminant hepatic failure with typhoid fever in childhood. *J Pak Med Assoc.* 1991;41(6):123-6.
6. Bhutta ZA, Mansoorali N, Hussain R. Plasma cytokines in paediatric typhoidal salmonellosis: correlation with clinical course and outcome. *J Infect.* 1997;35(3):253-6.

7. Bhutta ZA, Naqvi SH. Hepatic dysfunction in paediatric typhoidal salmonellosis. *AnnTropPaediatr.* 1991;11(3):203-5.
8. Bhutta ZA, Naqvi SH, Durrani S, Suria A. Chloramphenicol therapy of typhoid fever and its relationship to hepatic dysfunction. *JTropPediater.* 1991;37(6):320-2.
9. Bhutta ZA, Naqvi SH, Razzaq RA, Farooqui BJ. Multidrug-resistant typhoid in children: presentation and clinical features. *RevInfectDis.* 1991;13(5):832-6.
10. Bhutta ZA, Niazi SK, Suria A. Chloramphenicol clearance in typhoid fever: implications for therapy. *Indian J Pediatr.* 1992;59(2):213-9
11. Bhutta ZA. Enteric Fever: Risk Factors for Treatment Failure in the Era of Multidrug Resistance. UNPUBLISHED.
12. Biswal N. Neurological manifestations of typhoid fever in children. *J TropPediater.* 1994;40(3):190.
13. Biswal N, Mathai B, Bhatia BD, Srinivasan S, Nalini P. Enteric fever: a changing perspective. *Indian Pediatr.* 1994;31(7):813-9.
14. Brian MJ. Typhoid in children in Goroka. *PNGMed J.* 1990;33(1):68-9.
15. Buch NA, Hassan MU, Kakroo DK. Enteric fever--a changing sensitivity pattern, clinical profile and outcome. *Indian Pediatr.* 1994;31(8):981-5
16. Caglar MK, Ozsoylu S, Kanra G. Relative granulocytosis in childhood typhoid fever. *J Pediatr.* 1983;102(4):603-4
17. Chandra R, Srinivasan S, Nalini P, Rao RS. Multidrug resistant enteric fever. *J TropMed Hyg.* 1992;95(4):284-7.
18. Chawla V, Bhujwala RA, Chandra RK, Ghai OP. Typhoid fever in children. Clinical and bacteriological studies. *Indian J Pediatr.* 1970;37(269):239-44.
19. Chiu CH, Lin TY. Typhoid fever in children. *Lancet.* 1999;354(9194):2001-2.
20. Chiu CH, Tsai JR, Ou JT, Lin TY. Typhoid fever in children: a fourteen-year experience. *Acta PaediatrTaiwan.* 2000;41(1):28-32.
21. Choo KE, Razif A, Ariffin WA, Sepiah M, Gururaj A. Typhoid fever in hospitalized children in Kelantan, Malaysia. *AnnTropPaediatr.* 1988;8(4):207-12.
22. Chow CB, Wang PS, Leung NK. Typhoid fever in Hong Kong children. *AustPaediatrJ.* 1989;25(3):147-50.
23. Ciftci E, Guriz H, Derya AA, Ince E, Erdem B, Dogru U. Salmonella bacteraemia in Turkish children: 37 cases seen in a university hospital between 1993 and 2002. *AnnTropPaediatr.* 2004;24(1):75-80..
24. Collins RN, Marine WM, Nahmias AJ. The 1964 epidemic of typhoid fever in Atlanta. Clinical and epidemiologic observations. *JAMA.* 1966;197(3):179-84.
25. Colon AR, Gross DR, Tamer MA. Typhoid fever in children. *Pediatrics.* 1975;56(4):606-9.
26. Colon AR. Gastrointestinal phenomena in childhood typhoid fever. *SouthMed J.* 1976;69(7):914.
27. Daoud AS, Zaki M, Pugh RN, al-Mutairi G, Beseiso R, Nasrallah AY. Clinical presentation of enteric fever: its changing pattern in Kuwait. *J TropMed Hyg.* 1991;94(5):341-7
28. Del Rosario AJ, Haynes RE, Cramblett HG. Typhoid fever in children. *OhioState Med J.* 1971;67(6):516-20.
29. Dheer G, Kundra S, Singh T. Clinical and laboratory profile of enteric fever in children in northern India. *Trop Doct.* 2012 Jul;42(3):154-6.
30. Duggan MB, Beyer L. Enteric fever in young Yoruba children. *ArchDisChild.* 1975;50(1):67-71.

31. Dutta P, Lahiri M, Bhattacharya SK, Saha MR, Mitra U, Rasaily R, et al. Hepatitis-like presentation in typhoid fever. *TransRSocTropMed Hyg.* 1992;86(1):92.
32. Dutta P, Rasaily R, Saha MR, Mitra U, Manna B, Chakraborty S, et al. Randomized clinical trial of furazolidone for typhoid fever in children. *ScandJGastroenterol.* 1993;28(2):168-72.
33. Ellis ME, Moosa A, Hillier V. A review of typhoid fever in South African black children. *PostgradMed J.* 1990;66(782):1032-6..
34. Emary K, Moore CE, Chanpheaktra N, An KP, Chheng K, Sona S, et al. Enteric fever in Cambodian children is dominated by multidrug-resistant H58 *Salmonella enterica* serovar Typhi with intermediate susceptibility to ciprofloxacin. *Trans R Soc Trop Med Hyg.* 2012 Dec;106(12):718-24.
35. Galloway H, Clark NS, Blackhall M. Paediatric aspects of the Aberdeen typhoid outbreak. *ArchDisChild.* 1966;41(215):63-8.
36. Garg K, Mangal N, Mathur HC. Clinical profile of multi drug resistant typhoid fever in Jaipur City. *Indian Pediatr.* 1994;31(2):191-3.
37. Garg RA, Krashak R. Typhoid fever before two years of age. *Indian Pediatr.* 1993;30(6):805-8
38. Girgis NI, Tribble DR, Sultan Y, Farid Z. Short course chemotherapy with cefixime in children with multidrug-resistant *Salmonella typhi* Septicaemia. *J TropPediatr.* 1995;41(6):364-5.
39. Gulati S, Marwaha RK, Singhi S, Ayyagari A, Kumar L. Third generation cephalosporins in multi-drug resistant typhoid fever. *Indian Pediatr.* 1992;29(4):513-6.
40. Hardy G, Padfield CJ, Chadwick P, Partington MW. Typhoid outbreak in Kingston, Ont: experience with high-dose oral ampicillin. *CanMed AssocJ.* 1977;116(7):761-4, 7.
41. Hassan M. Multiply-resistant *Salmonella typhi* in children. *Drugs.* 1995;49 Suppl 2:457-9.
42. Hoa NT, Diep TS, Wain J, Parry CM, Hien TT, Smith MD, et al. Community-acquired septicaemia in southern Viet Nam: the importance of multidrug-resistant *Salmonella typhi*. *TransRSocTropMedHyg.* 1998;92(5):503-8.
43. Ispahani P, Slack RC. Enteric fever and other extraintestinal salmonellosis in University Hospital, Nottingham, UK, between 1980 and 1997. *EurJ ClinMicrobiolInfectDis.* 2000;19(9):679-87.
44. Jagadish K, Patwari AK, Sarin SK, Prakash C, Srivastava DK, Anand VK. Hepatic manifestations in typhoid fever. *Indian Pediatr.* 1994;31(7):807-11.
45. Jain S, Chitnis DS, Sham A, Rathi S, Inamdar S, Rindani GJ. Outbreak of chloramphenicol resistant typhoid fever. *Indian Pediatr.* 1987;24(3):193-7
46. Johnson AO, Aderole WI. Enteric fever in childhood. *J TropMed Hyg.* 1981;84(1):29-35.
47. Kabra SK, Madhulika, Talati A, Soni N, Patel S, Modi RR. Multidrug-resistant typhoid fever. *TropDoct.* 2000;30(4):195-7.
48. Kanra G, Yurdakok M, Secmeer G, Arvas A, Dereli O, Sarikayalar F, et al. Clinical findings of pediatric patients during an outbreak of typhoid fever in Ankara. *TurkJ Pediatr.* 1985;27(1):11-5.
49. Koul PB, Murali MV, Sharma PP, Ghai OP, Ramchandran VG, Talwar V. Multi drug resistant *Salmonella typhi* infection: clinical profile and therapy. *Indian Pediatr.* 1991;28(4):357-61.
50. Kumar R, Gupta N. Multidrug-resistant typhoid fever. *Indian J Pediatr.* 2007;74(1):39-42.

51. Kapoor JP, Mohan M, Talwar V, Daral TS, Bhargava SK. Typhoid fever in young children. *Indian Pediatr.* 1985;22(11):811-3.
52. Kulkarni ML, Rego SJ. Acute acalculous cholecystitis in typhoid fever. *Indian Pediatr.* 1995;32(7):829-30
53. Khan M, Coovadia YM, Connolly C, Sturm AW. Influence of sex on clinical features, laboratory findings, and complications of typhoid fever. *AmJ TropMed Hyg.* 1999;61(1):41-6.
54. Khuri-Bulos N. Enteric fevers in children. The importance of age in the varying clinical picture. *ClinPediatr (Phila).* 1981;20(7):448-52
55. Kagwa-Nyanzi JA. Typhoid fever in African children. *J TropPediatr EnvironChild Health.* 1971;17(3):105-9.
56. Laditan AA, Alausa KO. Problems in the clinical diagnosis of typhoid fever in children in the tropics. *AnnTropPaediatr.* 1981;1(3):191-5.
57. Lepage P, Bogaerts J, Van GC, Ntahorutaba M, Nsengumuremyi F, Hitimana DG, et al. Community-acquired bacteraemia in African children. *Lancet.* 1987;1(8548):1458-61.
58. Leung DT, Bogetz J, Itoh M, Ganapathi L, Pietroni MA, Ryan ET, et al. Factors associated with encephalopathy in patients with *Salmonella enterica* serotype Typhi bacteremia presenting to a diarrheal hospital in Dhaka, Bangladesh. *Am J Trop Med Hyg.* 2012 Apr;86(4):698-702.
59. Libov A. Enteric fever in children. *Indian JPediatr.* 1960;27:125-8.
60. Malik AS. Complications of bacteriologically confirmed typhoid fever in children. *J TropPediatr.* 2002;48(2):102-8.
61. Malik AS, Malik RH. Typhoid fever in Malaysian children. *Med J Malaysia.* 2001;56(4):478-90.
62. Mallouh AA, Sa'di AR. White blood cells and bone marrow in typhoid fever. *Pediatr InfectDisJ.* 1987;6(6):527-9.
63. Memon IA, Billoo AG, Memon HI. Cefixime: an oral option for the treatment of multidrug-resistant enteric fever in children. *SouthMed J.* 1997;90(12):1204-7.
64. Mishra S, Patwari AK, Anand VK, Pillai PK, Aneja S, Chandra J, et al. A clinical profile of multidrug resistant typhoid fever. *Indian Pediatr.* 1991;28(10):1171-4.
65. Misra S, Diaz PS, Rowley AH. Characteristics of typhoid fever in children and adolescents in a major metropolitan area in the United States. *ClinInfectDis.* 1997;24(5):998-
66. Moussa K. Enterica of childhood. *J EgyptPublic Health Assoc.* 1970;45(1):48-55.
67. Mtove G, Amos B, von Seidlein L, Hendriksen I, Mwambuli A, Kimera J, et al. Invasive salmonellosis among children admitted to a rural Tanzanian hospital and a comparison with previous studies. *PLoS One.* 2010;5(2):e9244.
68. Mulligan TO. Typhoid fever in young children. *BrMed J.* 1971;4(5788):665-7.
69. Naemullah S. A 3 year study of children with enteric fever. *Pakistan Pediatric Journal.* 1994;18(4):165-9.
70. Nesbitt A, Mirza NB. *Salmonella* septicaemias in Kenyan children. *J TropPediatr.* 1989;35(1):35-9.
71. Oh HM, Masayu Z, Chew SK. Typhoid fever in hospitalized children in Singapore. *J Infect.* 1997;34(3):237-42.
72. Palacios Malmaceda PG, Vela Acosta JJ, Gutierrez AW. [Typhoid fever in children under 2 years of age]. *BolMedHospInfant Mex.* 1981;38(3):473-83.

73. Papaevangelou V, Syriopoulou V, Charissiadou A, Pangalis A, Mostrou G, Theodoridou M. Salmonella bacteraemia in a tertiary children's hospital. *ScandJ InfectDis.* 2004;36(8):547-51.
74. Rajajee S, Anandi TB, Subha S, Vatsala BR. Patterns of resistant Salmonella typhi infection in infants. *JTropPediater.* 1995;41(1):52-4.
75. Raman TS, Krishnamurthy L, Menon PK, Singh D, Jayaprakash DG. Clinical profile and therapy in enteric fever. *Indian Pediatr.* 1994;31(2):196-9.
76. Ramanan A, Pandit N, Yeshwanth M. Unusual complications in a multidrug resistant Salmonella typhi outbreak. *Indian Pediatr.* 1992;29(1):118-20.
77. Rasaily R, Dutta P, Saha MR, Mitra U, Lahiri M, Pal SC. Multi-drug resistant typhoid fever in hospitalised children. Clinical, bacteriological and epidemiological profiles. *EurJ Epidemiol.* 1994;10(1):41-6.
78. Rathore MH, Bux D, Hasan M. Multidrug-resistant Salmonella typhi in Pakistani children: clinical features and treatment. *SouthMed J.* 1996;89(2):235-7.
79. Scragg JN, Rubidge CJ. Trimethoprim and sulphamethoxazole in typhoid fever in children. *BrMed J.* 1971;3(5777):738-41.
80. Secmeer G, Kanra G, Cemeroglu AP, Ozen H, Ceyhan M, Ecevit Z. Salmonella typhi infections. A 10-year retrospective study. *TurkJ Pediatr.* 1995;37(4):339-41.
81. Sethuraman S, Mahamood M, Kareem S. Furazolidone in multi-resistant childhood typhoid fever. *AnnTropPaediatr.* 1994;14(4):321-4.
82. Sharma A, Gathwala G. Clinical profile and outcome in enteric fever. *Indian Pediatr.* 1993;30(1):47-50.
83. Shetty AK, Mital SR, Bahrainwala AH, Khubchandani RP, Kumta NB. Typhoid hepatitis in children. *J TropPediater.* 1999;45(5):287-90.
84. Shwe TN, Nyein MM, Yi W, Mon A. Blood culture isolates from children admitted to Medical Unit III, Yangon Children's Hospital, 1998. *Southeast Asian J TropMed Public Health.*
85. Singh H, Raizada N. Chloramphenicol resistant typhoid fever. *Indian Pediatr.* 1991;28(4):433.
86. Smith M. Typhoid admissions in childhood. *TropDoct.* 1986;16(4):150-2
87. Soelistyowati S, Soenarto Y, Soesilo H, Widiarto, Widiatmodjo, Ismangoen. Typhoid fever in children. *PaediatrIndones.* 1982;22(7-8):138-46.
88. Stormon MO, McIntyre PB, Morris J, Fasher B. Typhoid fever in children: diagnostic and therapeutic difficulties. *Pediatr InfectDisJ.* 1997;16(7):713-4.
89. Su CP, Chen YC, Chang SC. Changing characteristics of typhoid fever in Taiwan. *J MicrobiolImmunolInfect.* 2004;37(2):109-14.
90. Takkar VP, Kumar R, Takkar R, Khurana S. Resurgence of chloramphenicol sensitive Salmonella typhi. *Indian Pediatr.* 1995;32(5):586-7.
91. Thambidorai CR, Shyamala J, Sarala R, Vatsala RB, Tamizhisai S. Acute acalculous cholecystitis associated with enteric fever in children. *Pediatr InfectDisJ.* 1995;14(9):812-3.
92. Tatli MM, Aktas G, Kosecik M, Yilmaz A. Treatment of typhoid fever in children with a flexible-duration of ceftriaxone, compared with 14-day treatment with chloramphenicol.
93. Thisyakorn U, Mansuwan P. Comparative efficacy of mecillinam, mecillinam/amoxicillin and trimethoprim-sulfamethoxazole for treatment of typhoid fever in children. *PediatrInfectDisJ.* 1992;11(11):979-80.
94. Thisyakorn U, Mansuwan P, Taylor DN. Typhoid and paratyphoid fever in 192 hospitalized children in Thailand. *AmJ DisChild.* 1987;141(8):862-5.

95. Tolaymat A, Fakhreddine F, David CB, Whitworth JM. Typhoid fever in children: a forgotten disease? *SouthMed J.* 1979;72(2):136-8.
96. Topley JM. Mild typhoid fever. *ArchDisChild.* 1986;61(2):164-7.
97. Verma PS, Mullick P, Ghosh S. Neurological manifestations of enteric fever: clinical profile and correlation with ultimate outcome. *Indian Pediatr.* 1972;9(11):681-5.
98. Walia M, Gaind R, Mehta R, Paul P, Aggarwal P, Kalaivani M. Current perspectives of enteric fever: a hospital-based study from India. *AnnTropPaediatr.* 2005;25(3):161-74.
99. Walia M, Gaind R, Paul P, Mehta R, Aggarwal P, Kalaivani M. Age-related clinical and microbiological characteristics of enteric fever in India. *TransRSocTropMed Hyg.* 2006;100(10):942-8.
100. Wang JL, Kao JH, Tseng SP, Teng LJ, Ho SW, Hsueh PR. Typhoid fever and typhoid hepatitis in Taiwan. *EpidemiolInfect.* 2005;133(6):1073-9.
101. Wongsawat J, Pancharoen C, Thisyakorn U. Typhoid fever in children: experience in King Chulalongkorn Memorial Hospital. *J Med AssocThai.* 2002;85(12):1247-50.
102. Yap YF, Puthuchery SD. Typhoid fever in children--a retrospective study of 54 cases from Malaysia. *Singapore Med J.* 1998;39(6):260-2.

• **Table S9: Typhoid fever in children in with multi-drug resistant versus sensitive strains of salmonella**

| Demographics/History                          | Multi-drug resistant<br>13 studies |     |            | Sensitive<br>22 studies |      |           |
|-----------------------------------------------|------------------------------------|-----|------------|-------------------------|------|-----------|
|                                               | n                                  | N   | %          | n                       | N    | %         |
| Males                                         | 358                                | 601 | <b>60</b>  | 864                     | 1500 | <b>58</b> |
| Duration of illness 1 - 2 weeks               | 80                                 | 272 | <b>29</b>  | 208                     | 897  | <b>23</b> |
| Duration of illness >2 weeks                  | 83                                 | 272 | <b>31</b>  | 164                     | 897  | <b>18</b> |
| Duration of illness > 1 week                  | 208                                | 334 | <b>62</b>  | 407                     | 1034 | <b>39</b> |
| Ampicillin/Amoxycillin resistance             | 125                                | 125 | <b>100</b> | 9                       | 186  | <b>5</b>  |
| Co-trimoxazole resistance                     | 125                                | 125 | <b>100</b> | 14                      | 186  | <b>8</b>  |
| <b>Laboratory features</b>                    |                                    |     |            |                         |      |           |
| Severe anaemia (<7.5 g/dl)                    | 2                                  | 39  | <b>5</b>   | 13                      | 75   | <b>17</b> |
| Thrombocytopenia (<150 x 10 <sup>3</sup> /μL) | 3                                  | 62  | <b>5</b>   | 39                      | 119  | <b>33</b> |
| <b>Other signs and symptoms</b>               |                                    |     |            |                         |      |           |
| Chills or rigors                              | 33                                 | 116 | <b>28</b>  | 22                      | 192  | <b>11</b> |
| Anorexia/refusal to feed                      | 27                                 | 77  | <b>35</b>  | 85                      | 253  | <b>34</b> |
| Continuous fever                              | 81                                 | 81  | <b>100</b> | 66                      | 171  | <b>39</b> |
| Intermittent fever                            | 44                                 | 62  | <b>71</b>  | 52                      | 137  | <b>38</b> |
| Remittent fever                               | 11                                 | 11  | <b>100</b> | 51                      | 137  | <b>37</b> |
| Chelosis                                      | 5                                  | 112 | <b>4</b>   | 6                       | 161  | <b>4</b>  |
| <b>Other complications</b>                    |                                    |     |            |                         |      |           |
| Myocarditis                                   | 10                                 | 157 | <b>6</b>   | 5                       | 313  | <b>2</b>  |
| Meningitis or meningismus                     | 3                                  | 54  | <b>6</b>   | 6                       | 210  | <b>3</b>  |
| Hepatitis or raised LFTs                      | 59                                 | 413 | <b>14</b>  | 22                      | 210  | <b>10</b> |
| Jaundice                                      | 43                                 | 416 | <b>10</b>  | 12                      | 317  | <b>4</b>  |
| Acute acalculouscholecystitis                 | 4                                  | 80  | <b>5</b>   | 3                       | 122  | <b>2</b>  |
| Edema or pleural effusion or ascites          | 5                                  | 181 | <b>3</b>   | 0                       | 11   | <b>0</b>  |
| Convulsions                                   | 2                                  | 54  | <b>4</b>   | 8                       | 233  | <b>3</b>  |
| Epistaxis/bleeding (unspecified)              | 2                                  | 39  | <b>5</b>   | 3                       | 62   | <b>5</b>  |
| Any abscess                                   | 0                                  | 62  | <b>0</b>   | 1                       | 47   | <b>2</b>  |

|                                    |   |    |   |    |     |    |
|------------------------------------|---|----|---|----|-----|----|
| Renal involvement                  | 3 | 95 | 3 | 46 | 116 | 40 |
| Arthritis or arthralgia or myalgia | 1 | 77 | 1 | 45 | 233 | 19 |

- Table S10: Associations of clinical features in enteric fever in children with multi-drug resistant versus sensitive strains of *S. Typhi* and *S. Paratyphi*

| Clinical Features                   | Odds Ratio | 95% Confidence Interval |
|-------------------------------------|------------|-------------------------|
| Duration of illness $\leq$ 1 week   | 0.4        | 0.3 - 0.5               |
| Headache                            | 2.4        | 1.7 - 3.3               |
| Toxicity                            | 2.1        | 1.6 - 2.6               |
| Hepatomegaly                        | 2.3        | 1.9 - 2.7               |
| Splenomegaly                        | 2.4        | 2.0 - 2.9               |
| Abdominal pain/tenderness           | 2.4        | 2.0 - 3.0               |
| Abdominal distention or ileus       | 2.6        | 1.7 - 4.1               |
| Anaemia                             | 1.6        | 1.3 - 2.0               |
| Leucopenia                          | 0.5        | 0.3 - 0.8               |
| Shock                               | 2.9        | 1.2 - 7.3               |
| Pneumonia                           | 2.2        | 1.3 - 3.7               |
| GI bleeding                         | 2.3        | 1.1 - 4.5               |
| Relapse                             | 0.3        | 0.1 - 0.7               |
| High grade fever                    | 0.6        | 0.5 - 0.8               |
| Bradycardia or relative bradycardia | 9.1        | 2.3 - 36.4              |
| Dehydration                         | 10.9       | 3.3 - 36.0              |
| Duration of illness $>$ 1 week      | 2.7        | 2.1 - 3.4               |
| Jaundice                            | 2.9        | 1.5 - 5.7               |
| Renal involvement                   | 0.05       | 0.01 - 0.2              |
| Duration of illness $>$ 2 weeks     | 2.0        | 1.4 - 2.7               |
| Thrombocytopenia ( $<$ 150)         | 0.1        | 0.03 - 0.3              |
| Chills or rigors                    | 3.1        | 1.7 - 5.6               |
| Myocarditis                         | 4.2        | 1.4 - 12.5              |
| Arthritis or arthralgia or myalgia  | 0.05       | 0.01 - 0.4              |

### References to Table 4, Table S9 and Table S10: Typhoid fever in children with multi-drug resistant versus sensitive strains of salmonella

#### Sensitive

1. Agarwal KS, Singh SK, Kumar N, Srivastav R, Rajkumar A. A study of current trends in enteric fever. J CommunDis. 1998;30(3):171-4.
2. Bhutta ZA. Impact of age and drug resistance on mortality in typhoid fever. ArchDisChild. 1996;75(3):214-7.
3. Bhutta ZA. Enteric Fever: Risk Factors for Treatment Failure in the Era of Multidrug Resistance. UNPUBLISHED.



4. Buch NA, Hassan MU, Kakroo DK. Enteric fever--a changing sensitivity pattern, clinical profile and outcome. *Indian Pediatr.* 1994;31(8):981-5.
5. Chandra R, Srinivasan S, Nalini P, Rao RS. Multidrug resistant enteric fever. *J TropMed Hyg.* 1992;95(4):284-7.
6. Choo KE, Razif A, Ariffin WA, Sepiah M, Gururaj A. Typhoid fever in hospitalized children in Kelantan, Malaysia. *AnnTropPaediatr.* 1988;8(4):207-12.
7. Hardy G, Padfield CJ, Chadwick P, Partington MW. Typhoid outbreak in Kingston, Ont: experience with high-dose oral ampicillin. *CanMed AssocJ.* 1977;116(7):761-4, 7.
8. Jain S, Chitnis DS, Sham A, Rathi S, Inamdar S, Rindani GJ. Outbreak of chloramphenicol resistant typhoid fever. *Indian Pediatr.* 1987;24(3):193-7.
9. Kabra SK, Madhulika, Talati A, Soni N, Patel S, Modi RR. Multidrug-resistant typhoid fever. *TropDoct.* 2000;30(4):195-7.
10. Koul PB, Murali MV, Sharma PP, Ghai OP, Ramchandran VG, Talwar V. Multi drug resistant *Salmonella typhi* infection: clinical profile and therapy. *Indian Pediatr.* 1991;28(4):357-61.
11. Lepage P, Bogaerts J, Van GC, Ntahorutaba M, Nsengumuremyi F, Hitimana DG, et al. Community-acquired bacteraemia in African children. *Lancet.* 1987;1(8548):1458-61.
12. Malik AS. Complications of bacteriologically confirmed typhoid fever in children. *J TropPediatr.* 2002;48(2):102-8.
13. Malik AS, Malik RH. Typhoid fever in Malaysian children. *Med J Malaysia.* 2001;56(4):478-90.
14. Ishra S, Patwari AK, Anand VK, Pillai PK, Aneja S, Chandra J, et al. A clinical profile of multidrug resistant typhoid fever. *Indian Pediatr.* 1991;28(10):1171-4.
15. Nesbitt A, Mirza NB. *Salmonella* septicaemias in Kenyan children. *J TropPediatr.* 1989;35(1):35-9.
16. Papaevangelou V, Syriopoulou V, Charissiadou A, Pangalis A, Mostrou G, Theodoridou M. *Salmonella* bacteraemia in a tertiary children's hospital. *ScandJ InfectDis.* 2004;36(8):547-51.
17. Raman TS, Krishnamurthy L, Menon PK, Singh D, Jayaprakash DG. Clinical profile and therapy in enteric fever. *Indian Pediatr.* 1994;31(2):196-9.
18. Sharma A, Gathwala G. Clinical profile and outcome in enteric fever. *Indian Pediatr.* 1993;30(1):47-50.
19. Su CP, Chen YC, Chang SC. Changing characteristics of typhoid fever in Taiwan. *J MicrobiolImmunolInfect.* 2004;37(2):109-14.
20. Takkar VP, Kumar R, Takkar R, Khurana S. Resurgence of chloramphenicol sensitive *Salmonella typhi*. *Indian Pediatr.* 1995;32(5):586-7.
21. Tatli MM, Aktas G, Kosecik M, Yilmaz A. Treatment of typhoid fever in children with a flexible-duration of ceftriaxone, compared with 14-day treatment with chloramphenicol. *IntJAntimicrobAgents.* 2003;21(4):350-3.
22. Thisyakorn U, Mansuwan P. Comparative efficacy of mecillinam, mecillinam/amoxicillin and trimethoprim-sulfamethoxazole for treatment of typhoid fever in children. *PediatrInfectDisJ.* 1992;11(11):979-80.
23. Wang JL, Kao JH, Tseng SP, Teng LJ, Ho SW, Hsueh PR. Typhoid fever and typhoid hepatitis in Taiwan. *EpidemiolInfect.* 2005;133(6):1073-9.
24. Wongsawat J, Pancharoen C, Thisyakorn U. Typhoid fever in children: experience in King Chulalongkorn Memorial Hospital. *J Med AssocThai.* 2002;85(12):1247-50.

## MDR

1. Bhutta ZA. Impact of age and drug resistance on mortality in typhoid fever. *ArchDisChild*. 1996;75(3):214-7.
2. Bhutta ZA. Enteric Fever: Risk Factors for Treatment Failure in the Era of Multidrug Resistance. UNPUBLISHED.
3. Buch NA, Hassan MU, Kakroo DK. Enteric fever--a changing sensitivity pattern, clinical profile and outcome. *Indian Pediatr*. 1994;31(8):981-5.
4. Chandra R, Srinivasan S, Nalini P, Rao RS. Multidrug resistant enteric fever. *J TropMed Hyg*. 1992;95(4):284-7.
5. Dutta P, Lahiri M, Bhattacharya SK, Saha MR, Mitra U, Rasaily R, et al. Hepatitis-like presentation in typhoid fever. *TransRSocTropMed Hyg*. 1992;86(1):92.
6. Girgis NI, Tribble DR, Sultan Y, Farid Z. Short course chemotherapy with cefixime in children with multidrug-resistant *Salmonella typhi* Septicaemia. *J TropPediatr*. 1995;41(6):364-5.
7. Gulati S, Marwaha RK, Singhi S, Ayyagari A, Kumar L. Third generation cephalosporins in multi-drug resistant typhoid fever. *Indian Pediatr*. 1992;29(4):513-6.
8. Jagadish K, Patwari AK, Sarin SK, Prakash C, Srivastava DK, Anand VK. Hepatic manifestations in typhoid fever. *Indian Pediatr*. 1994;31(7):807-11.
9. Kabra SK, Madhulika, Talati A, Soni N, Patel S, Modi RR. Multidrug-resistant typhoid fever. *TropDoct*. 2000;30(4):195-7.
10. Khan MI, Soofi SB, Ochiai RL, Khan MJ, Sahito SM, Habib MA, et al. Epidemiology, clinical presentation, and patterns of drug resistance of *Salmonella Typhi* in Karachi, Pakistan. *J Infect Dev Ctries*. 2012 Oct;6(10):704-14.
11. Koul PB, Murali MV, Sharma PP, Ghai OP, Ramchandran VG, Talwar V. Multi drug resistant *Salmonella typhi* infection: clinical profile and therapy. *Indian Pediatr*. 1991;28(4):357-61.
12. Kumar R, Gupta N. Multidrug-resistant typhoid fever. *Indian J Pediatr*. 2007;74(1):39-42.
13. Mishra S, Patwari AK, Anand VK, Pillai PK, Aneja S, Chandra J, et al. A clinical profile of multidrug resistant typhoid fever. *Indian Pediatr*. 1991;28(10):1171-4.
14. Raman TS, Krishnamurthy L, Menon PK, Singh D, Jayaprakash DG. Clinical profile and therapy in enteric fever. *Indian Pediatr*. 1994;31(2):196-9.
15. Rasaily R, Dutta P, Saha MR, Mitra U, Lahiri M, Pal SC. Multi-drug resistant typhoid fever in hospitalised children. Clinical, bacteriological and epidemiological profiles. *EurJ Epidemiol*. 1994;10(1):41-6.
16. Sharma A, Gathwala G. Clinical profile and outcome in enteric fever. *Indian Pediatr*. 1993;30(1):47-50.

Table S11 :Time-line of included studies on enteric fever in children

|                                               | 1950-1970s<br>13 studies |      |           | 1980-1989<br>21 studies |      |           | 1990 – 1999<br>30 studies |      |           | 2000-2013<br>12 studies |     |            |
|-----------------------------------------------|--------------------------|------|-----------|-------------------------|------|-----------|---------------------------|------|-----------|-------------------------|-----|------------|
| <b>Demographics/History</b>                   | N                        | N    | %         | n                       | N    | %         | n                         | N    | %         | n                       | N   | %          |
| Blood/bone marrow Isolates                    | 882                      | 1113 | <b>79</b> | 1283                    | 1629 | <b>79</b> | 4562                      | 4941 | <b>92</b> | 918                     | 918 | <b>100</b> |
| Pre-treatment antibiotics received            | 23                       | 34   | <b>68</b> | 137                     | 295  | <b>46</b> | 1875                      | 3283 | <b>57</b> | 45                      | 227 | <b>20</b>  |
| Duration of illness≤ 1week                    | 204                      | 404  | <b>50</b> | 516                     | 841  | <b>61</b> | 711                       | 1570 | <b>45</b> | 82                      | 251 | <b>33</b>  |
| Multi-drug resistant isolates                 | 0                        | 127  | <b>0</b>  | 1                       | 351  | <b>0</b>  | 1609                      | 3772 | <b>43</b> | 281                     | 598 | <b>47</b>  |
| Fluoroquinolone resistance                    |                          |      |           |                         |      |           | 12                        | 1148 | <b>1</b>  | 8                       | 167 | <b>5</b>   |
| Chloramphenicol resistance                    | 0                        | 127  | <b>0</b>  | 49                      | 497  | <b>10</b> | 591                       | 1042 | <b>57</b> | 0                       | 72  | <b>0</b>   |
| <b>Signs &amp; Symptoms: Systemic</b>         |                          |      |           |                         |      |           |                           |      |           |                         |     |            |
| Fever                                         | 662                      | 711  | <b>93</b> | 1327                    | 1399 | <b>95</b> | 3694                      | 4014 | <b>92</b> | 731                     | 732 | <b>100</b> |
| High grade fever                              | 8                        | 70   | <b>11</b> | 199                     | 385  | <b>52</b> | 1847                      | 2706 | <b>68</b> | 247                     | 465 | <b>53</b>  |
| Chills or rigors                              | 22                       | 137  | <b>16</b> | 39                      | 488  | <b>8</b>  | 185                       | 566  | <b>33</b> | 48                      | 190 | <b>25</b>  |
| Bradycardia or relative bradycardia           | 30                       | 390  | <b>8</b>  | 355                     | 771  | <b>46</b> | 24                        | 149  | <b>16</b> | 9                       | 270 | <b>3</b>   |
| Anorexia/refusal to feed                      | 203                      | 463  | <b>44</b> | 269                     | 523  | <b>51</b> | 706                       | 3046 | <b>23</b> | 92                      | 319 | <b>29</b>  |
| Headache                                      | 147                      | 538  | <b>27</b> | 456                     | 1235 | <b>37</b> | 295                       | 3256 | <b>9</b>  | 314                     | 766 | <b>41</b>  |
| Toxicity                                      | 171                      | 295  | <b>58</b> | 79                      | 288  | <b>27</b> | 978                       | 3310 | <b>30</b> | 48                      | 76  | <b>63</b>  |
| Coated tongue                                 | 81                       | 150  | <b>54</b> | 157                     | 196  | <b>80</b> | 146                       | 294  | <b>50</b> | 65                      | 198 | <b>33</b>  |
| <b>Respiratory and abdominal</b>              |                          |      |           |                         |      |           |                           |      |           |                         |     |            |
| Cough                                         | 244                      | 641  | <b>38</b> | 290                     | 878  | <b>33</b> | 464                       | 2377 | <b>20</b> | 178                     | 666 | <b>27</b>  |
| Nausea or vomiting                            | 290                      | 655  | <b>44</b> | 354                     | 935  | <b>38</b> | 1361                      | 3757 | <b>36</b> | 282                     | 783 | <b>36</b>  |
| Diarrhea                                      | 280                      | 701  | <b>40</b> | 718                     | 1561 | <b>46</b> | 1312                      | 3964 | <b>33</b> | 182                     | 802 | <b>23</b>  |
| Constipation                                  | 87                       | 348  | <b>25</b> | 243                     | 811  | <b>30</b> | 251                       | 3445 | <b>7</b>  | 35                      | 583 | <b>6</b>   |
| Hepatomegaly                                  | 139                      | 471  | <b>30</b> | 372                     | 747  | <b>50</b> | 1922                      | 4123 | <b>47</b> | 359                     | 603 | <b>60</b>  |
| Splenomegaly                                  | 343                      | 869  | <b>39</b> | 266                     | 905  | <b>29</b> | 1280                      | 4358 | <b>29</b> | 222                     | 603 | <b>37</b>  |
| Abdominal pain or tenderness                  | 273                      | 559  | <b>49</b> | 574                     | 1476 | <b>39</b> | 764                       | 3194 | <b>24</b> | 383                     | 763 | <b>50</b>  |
| Abdominal distention or ileus                 | 235                      | 611  | <b>38</b> | 292                     | 1155 | <b>25</b> | 171                       | 3657 | <b>5</b>  | 43                      | 515 | <b>8</b>   |
| <b>Laboratory features</b>                    |                          |      |           |                         |      |           |                           |      |           |                         |     |            |
| Anaemia (Hb < 12 g/dl)                        | 233                      | 467  | <b>50</b> | 323                     | 967  | <b>33</b> | 2124                      | 2959 | <b>72</b> | 189                     | 337 | <b>56</b>  |
| Leucopenia (< 5 x 10 <sup>3</sup> /μL)        | 92                       | 379  | <b>24</b> | 272                     | 906  | <b>30</b> | 109                       | 1589 | <b>7</b>  | 26                      | 338 | <b>8</b>   |
| Leucocytosis (> 15 x 10 <sup>3</sup> /μL)     | 16                       | 161  | <b>10</b> | 25                      | 302  | <b>8</b>  | 330                       | 1465 | <b>23</b> | 54                      | 275 | <b>20</b>  |
| Thrombocytopenia (<150 x 10 <sup>3</sup> /μL) | 41                       | 161  | <b>25</b> | 104                     | 415  | <b>25</b> | 79                        | 1188 | <b>7</b>  | 39                      | 198 | <b>20</b>  |
| <b>Complications &amp; outcome</b>            |                          |      |           |                         |      |           |                           |      |           |                         |     |            |
| Shock or hypotension                          | 8                        | 188  | <b>4</b>  | 3                       | 81   | <b>4</b>  | 89                        | 2344 | <b>4</b>  | 24                      | 408 | <b>6</b>   |
| Altered mental status                         | 146                      | 650  | <b>22</b> | 276                     | 1495 | <b>18</b> | 290                       | 4176 | <b>7</b>  | 75                      | 517 | <b>15</b>  |
| Pneumonia or chest signs                      | 117                      | 610  | <b>19</b> | 276                     | 1204 | <b>23</b> | 148                       | 1580 | <b>9</b>  | 37                      | 394 | <b>9</b>   |
| GI bleeding                                   | 40                       | 784  | <b>5</b>  | 23                      | 1351 | <b>2</b>  | 48                        | 716  | <b>7</b>  | 39                      | 586 | <b>7</b>   |
| GI perforation                                | 58                       | 660  | <b>9</b>  | 12                      | 1047 | <b>1</b>  | 7                         | 775  | <b>1</b>  | 3                       | 130 | <b>2</b>   |
| Hepatitis or raised LFTs                      | 18                       | 277  | <b>6</b>  | 66                      | 145  | <b>46</b> | 172                       | 2072 | <b>8</b>  | 43                      | 266 | <b>16</b>  |

|          |    |     |   |    |      |   |     |      |   |    |     |   |
|----------|----|-----|---|----|------|---|-----|------|---|----|-----|---|
| Jaundice | 21 | 484 | 4 | 22 | 534  | 4 | 81  | 3381 | 2 | 38 | 408 | 9 |
| Relapse  | 59 | 658 | 9 | 29 | 1053 | 3 | 173 | 3235 | 5 | 5  | 248 | 2 |
| Death    | 73 | 986 | 7 | 40 | 1518 | 3 | 62  | 4288 | 1 | 5  | 722 | 1 |

### **References to Table S6 : Time-line of included studies on enteric fever in children**

1950 - 1970

1. Collins RN, Marine WM, Nahmias AJ. The 1964 epidemic of typhoid fever in Atlanta. Clinical and epidemiologic observations. *JAMA*. 1966;197(3):179-84.
2. Colon AR. Gastrointestinal phenomena in childhood typhoid fever. *SouthMed J*. 1976;69(7):914.
3. Colon AR, Gross DR, Tamer MA. Typhoid fever in children. *Pediatrics*. 1975;56(4):606-9.
4. Del Rosario AJ, Haynes RE, Cramblett HG. Typhoid fever in children. *OhioState Med J*. 1971;67(6):516-20.
5. Duggan MB, Beyer L. Enteric fever in young Yoruba children. *ArchDisChild*. 1975;50(1):67-71.
6. Galloway H, Clark NS, Blackhall M. Paediatric aspects of the Aberdeen typhoid outbreak. *ArchDisChild*. 1966;41(215):63-8.
7. Hardy G, Padfield CJ, Chadwick P, Partington MW. Typhoid outbreak in Kingston, Ont: experience with high-dose oral ampicillin. *CanMed Assoc J*. 1977;116(7):761-4, 7.
8. Johnson AO, Aderole WI. Enteric fever in childhood. *J TropMed Hyg*. 1981;84(1):29-35.
9. Laditan AA, Alausa KO. Problems in the clinical diagnosis of typhoid fever in children in the tropics. *AnnTropPaediatr*. 1981;1(3):191-5.
10. Khuri-Bulos N. Enteric fevers in children. The importance of age in the varying clinical picture. *ClinPediater (Phila)*. 1981;20(7):448-52.
11. Kagwa-Nyanzi JA. Typhoid fever in African children. *J TropPediater EnvironChild Health*. 1971;17(3):105-9.
12. Moussa K. Enterica of childhood. *J EgyptPublic Health Assoc*. 1970;45(1):48-55.
13. Mulligan TO. Typhoid fever in young children. *BrMed J*. 1971;4(5788):665-7.
14. Scragg JN, Rubidge CJ. Trimethoprim and sulphamethoxazole in typhoid fever in children. *BrMed J*. 1971;3(5777):738-41.
15. Tolaymat A, Fakhreddine F, David CB, Whitworth JM. Typhoid fever in children: a forgotten disease? *SouthMed J*. 1979;72(2):136-8.
16. Verma PS, Mullick P, Ghosh S. Neurological manifestations of enteric fever: clinical profile and correlation with ultimate outcome. *Indian Pediatr*. 1972;9(11):681-5.

1980 - 1989

1. Brian MJ. Typhoid in children in Goroka. *PNGMed J*. 1990;33(1):68-9.
2. Caglar MK, Ozsoylu S, Kanra G. Relative granulocytosis in childhood typhoid fever. *J Pediatr*. 1983;102(4):603-4.
3. Chiu CH, Lin TY. Typhoid fever in children. *Lancet*. 1999;354(9194):2001-2.

4. Chiu CH, Tsai JR, Ou JT, Lin TY. Typhoid fever in children: a fourteen-year experience. *Acta PaediatrTaiwan*. 2000;41(1):28-32.
5. Choo KE, Razif A, Ariffin WA, Sepiah M, Gururaj A. Typhoid fever in hospitalized children in Kelantan, Malaysia. *AnnTropPaediatr*. 1988;8(4):207-12.
6. Chow CB, Wang PS, Leung NK. Typhoid fever in Hong Kong children. *AustPaediatrJ*. 1989;25(3):147-50.
7. Daoud AS, Zaki M, Pugh RN, al-Mutairi G, Beseiso R, Nasrallah AY. Clinical presentation of enteric fever: its changing pattern in Kuwait. *J TropMed Hyg*. 1991;94(5):341-7.
8. Ellis ME, Moosa A, Hillier V. A review of typhoid fever in South African black children. *PostgradMed J*. 1990;66(782):1032-6.
9. Ferreccio C, Levine MM, Manterola A, Rodriguez G, Rivara I, Prenzel I, et al. Benign bacteremia caused by *Salmonella typhi* and paratyphi in children younger than 2 years. *J Pediatr*. 1984;104(6):899-901.
10. Green SD, Cheesbrough JS. *Salmonella* bacteraemia among young children at a rural hospital in western Zaire. *AnnTropPaediatr*. 1993;13(1):45-53.
11. Ispahani P, Slack RC. Enteric fever and other extraintestinal salmonellosis in University Hospital, Nottingham, UK, between 1980 and 1997. *EurJ ClinMicrobiolInfectDis*. 2000;19(9):679-87.
12. Jain S, Chitnis DS, Sham A, Rathi S, Inamdar S, Rindani GJ. Outbreak of chloramphenicol resistant typhoid fever. *Indian Pediatr*. 1987;24(3):193-7.
13. Kanra G, Yurdakok M, Secmeer G, Arvas A, Dereli O, Sarikayalar F, et al. Clinical findings of pediatric patients during an outbreak of typhoid fever in Ankara. *TurkJ Pediatr*. 1985;27(1):11-5.
14. Kapoor JP, Mohan M, Talwar V, Daral TS, Bhargava SK. Typhoid fever in young children. *Indian Pediatr*. 1985;22(11):811-3.
15. Lepage P, Bogaerts J, Van GC, Ntahorutaba M, Nsengumuremyi F, Hitimana DG, et al. Community-acquired bacteraemia in African children. *Lancet*. 1987;1(8548):1458-61.
16. Mallouh AA, Sa'di AR. White blood cells and bone marrow in typhoid fever. *Pediatr InfectDisJ*. 1987;6(6):527-9
17. Nesbitt A, Mirza NB. *Salmonella* septicaemias in Kenyan children. *J TropPediatr*. 1989;35(1):35-9.
18. Secmeer G, Kanra G, Cemeroglu AP, Ozen H, Ceyhan M, Ecevit Z. *Salmonella typhi* infections. A 10-year retrospective study. *TurkJ Pediatr*. 1995;37(4):339-41.
19. Soelistyowati S, Soenarto Y, Soesilo H, Widiarto, Widiatmodjo, Ismangoen. Typhoid fever in children. *PaediatrIndones*. 1982;22(7-8):138-46.
20. Stormon MO, McIntyre PB, Morris J, Fasher B. Typhoid fever in children: diagnostic and therapeutic difficulties. *Pediatr InfectDisJ*. 1997;16(7):713-4.
21. Thisyakorn U, Mansuwan P, Taylor DN. Typhoid and paratyphoid fever in 192 hospitalized children in Thailand. *AmJ DisChild*. 1987;141(8):862-5.
22. Yap YF, Puthuchearu SD. Typhoid fever in children--a retrospective study of 54 cases from Malaysia. *Singapore Med J*. 1998;39(6):260-2.

1990 - 1994

1. Ahmad KA, Khan LH, Roshan B, Bhutta ZA. Factors associated with typhoid relapse in the era of multiple drug resistant strains. *J Infect Dev Ctries*. 2011 Oct;5(10):727-31.

2. Arora RK, Gupta A, Joshi NM, Kataria VK, Lall P, Anand AC. Multidrug resistant typhoid fever: study of an outbreak in Calcutta. *Indian Pediatr.* 1992;29(1):61-6.
3. Bhutta ZA. Impact of age and drug resistance on mortality in typhoid fever. *ArchDisChild.* 1996;75(3):214-7.
4. Bhutta ZA. Fulminant hepatic failure with typhoid fever in childhood. *J Pak Med Assoc.* 1991;41(6):123-6.
5. Bhutta ZA, Mansoorali N, Hussain R. Plasma cytokines in paediatric typhoidal salmonellosis: correlation with clinical course and outcome. *J Infect.* 1997;35(3):253-6.
6. Bhutta ZA, Naqvi SH. Hepatic dysfunction in paediatric typhoidal salmonellosis. *AnnTropPaediatr.* 1991;11(3):203-5.
7. Bhutta ZA, Naqvi SH, Durrani S, Suria A. Chloramphenicol therapy of typhoid fever and its relationship to hepatic dysfunction. *JTropPediatr.* 1991;37(6):320-2.
8. Bhutta ZA, Naqvi SH, Razzaq RA, Farooqui BJ. Multidrug-resistant typhoid in children: presentation and clinical features. *RevInfectDis.* 1991;13(5):832-6.
9. Bhutta ZA, Niazi SK, Suria A. Chloramphenicol clearance in typhoid fever: implications for therapy. *Indian J Pediatr.* 1992;59(2):213-9
10. Bhutta ZA. Enteric Fever: Risk Factors for Treatment Failure in the Era of Multidrug Resistance. UNPUBLISHED.
11. Biswal N. Neurological manifestations of typhoid fever in children. *J TropPediatr.* 1994;40(3):190.
12. Biswal N, Mathai B, Bhatia BD, Srinivasan S, Nalini P. Enteric fever: a changing perspective. *Indian Pediatr.* 1994;31(7):813-9.
13. Buch NA, Hassan MU, Kakroo DK. Enteric fever--a changing sensitivity pattern, clinical profile and outcome. *Indian Pediatr.* 1994;31(8):981-5.
14. Chandra R, Srinivasan S, Nalini P, Rao RS. Multidrug resistant enteric fever. *J TropMed Hyg.* 1992;95(4):284-7.
15. Dutta P, Lahiri M, Bhattacharya SK, Saha MR, Mitra U, Rasaily R, et al. Hepatitis-like presentation in typhoid fever. *TransRSocTropMed Hyg.* 1992;86(1):92.
16. Dutta P, Rasaily R, Saha MR, Mitra U, Manna B, Chakraborty S, et al. Randomized clinical trial of furazolidone for typhoid fever in children. *ScandJGastroenterol.* 1993;28(2):
17. Garg RA, Krashak R. Typhoid fever before two years of age. *Indian Pediatr.* 1993;30(6):805-8.
18. Girgis NI, Tribble DR, Sultan Y, Farid Z. Short course chemotherapy with cefixime in children with multidrug-resistant *Salmonella typhi* Septicaemia. *J TropPediatr.* 1995;41(6):364-5.
19. Hassan M. Multiply-resistant *Salmonella typhi* in children. *Drugs.* 1995;49 Suppl 2:457-9.
20. Hoa NT, Diep TS, Wain J, Parry CM, Hien TT, Smith MD, et al. Community-acquired septicaemia in southern Viet Nam: the importance of multidrug-resistant *Salmonella typhi*. *TransRSocTropMedHyg.* 1998;92(5):503-8.
21. Khan M, Coovadia YM, Connolly C, Sturm AW. Influence of sex on clinical features, laboratory findings, and complications of typhoid fever. *AmJ TropMed Hyg.* 1999;61(1):41-6.
22. Koul PB, Murali MV, Sharma PP, Ghai OP, Ramchandran VG, Talwar V. Multi drug resistant *Salmonella typhi* infection: clinical profile and therapy. *Indian Pediatr.* 1991;28(4):357-61.

23. Memon IA, Billoo AG, Memon HI. Cefixime: an oral option for the treatment of multidrug-resistant enteric fever in children. *SouthMed J.* 1997;90(12):1204-7.
24. Misra S, Diaz PS, Rowley AH. Characteristics of typhoid fever in children and adolescents in a major metropolitan area in the United States. *ClinInfectDis.* 1997;24(5):998-1000.
25. Mishra S, Patwari AK, Anand VK, Pillai PK, Aneja S, Chandra J, et al. A clinical profile of multidrug resistant typhoid fever. *Indian Pediatr.* 1991;28(10):1171-4.
26. Oh HM, Masayu Z, Chew SK. Typhoid fever in hospitalized children in Singapore. *J Infect.* 1997;34(3):237-42.
27. Rajajee S, Anandi TB, Subha S, Vatsala BR. Patterns of resistant *Salmonella typhi* infection in infants. *JTropPediatr.* 1995;41(1):52-4.
28. Ramanan A, Pandit N, Yeshwanth M. Unusual complications in a multidrug resistant *Salmonella typhi* outbreak. *Indian Pediatr.* 1992;29(1):118-20.
29. Rasaily R, Dutta P, Saha MR, Mitra U, Lahiri M, Pal SC. Multi-drug resistant typhoid fever in hospitalised children. Clinical, bacteriological and epidemiological profiles. *EurJ Epidemiol.* 1994;10(1):41-6
30. Rathore MH, Bux D, Hasan M. Multidrug-resistant *Salmonella typhi* in Pakistani children: clinical features and treatment. *SouthMed J.* 1996;89(2):235-7.
31. Shetty AK, Mital SR, Bahrainwala AH, Khubchandani RP, Kumta NB. Typhoid hepatitis in children. *J TropPediatr.* 1999;45(5):287-90
32. Sethuraman S, Mahamood M, Kareem S. Furazolidone in multi-resistant childhood typhoid fever. *AnnTropPaediatr.* 1994;14(4):321-4.
33. Thambidorai CR, Shyamala J, Sarala R, Vatsala RB, Tamizhisai S. Acute acalculous cholecystitis associated with enteric fever in children. *Pediatr InfectDisJ.* 1995;14(9):812-3.

#### 1995 - 1999

1. Ciftci E, Guriz H, Derya AA, Ince E, Erdem B, Dogru U. *Salmonella* bacteraemia in Turkish children: 37 cases seen in a university hospital between 1993 and 2002. *AnnTropPaediatr.* 2004;24(1):75-80.
2. Malik AS. Complications of bacteriologically confirmed typhoid fever in children. *J TropPediatr.* 2002;48(2):102-8.
3. Malik AS, Malik RH. Typhoid fever in Malaysian children. *Med J Malaysia.* 2001;56(4):478-90.
4. Papaevangelou V, Syriopoulou V, Charissiadou A, Pangalis A, Mostrou G, Theodoridou M. *Salmonella* bacteraemia in a tertiary children's hospital. *ScandJ InfectDis.* 2004;36(8):547-51.
5. Shwe TN, Nyein MM, Yi W, Mon A. Blood culture isolates from children admitted to Medical Unit III, Yangon Children's Hospital, 1998. *Southeast Asian J TropMed Public Health.* 2002;33(4):764-71.
6. Sinha A, Sazawal S, Kumar R, Sood S, Reddaiah VP, Singh B, et al. Typhoid fever in children aged less than 5 years. *Lancet.* 1999;354(9180):734-7.
7. Su CP, Chen YC, Chang SC. Changing characteristics of typhoid fever in Taiwan. *J MicrobiolImmunolInfect.* 2004;37(2):109-14.
8. Wongsawat J, Pancharoen C, Thisyakorn U. Typhoid fever in children: experience in King Chulalongkorn Memorial Hospital. *J Med AssocThai.* 2002;85(12):1247-50.

#### 2000 onwards

1. Dheer G, Kundra S, Singh T. Clinical and laboratory profile of enteric fever in children in northern India. *Trop Doct*. 2012 Jul;42(3):154-6.
2. Emary K, Moore CE, Chanpheaktra N, An KP, Chheng K, Sona S, et al. Enteric fever in Cambodian children is dominated by multidrug-resistant H58 *Salmonella enterica* serovar Typhi with intermediate susceptibility to ciprofloxacin. *Trans R Soc Trop Med Hyg*. 2012 Dec;106(12):718-24.
3. Khan MI, Soofi SB, Ochiai RL, Khan MJ, Sahito SM, Habib MA, et al. Epidemiology, clinical presentation, and patterns of drug resistance of *Salmonella* Typhi in Karachi, Pakistan. *J Infect Dev Ctries*. 2012 Oct;6(10):704-14.
4. Kumar R, Gupta N. Multidrug-resistant typhoid fever. *Indian J Pediatr*. 2007;74(1):39-42.
5. Leung DT, Bogetz J, Itoh M, Ganapathi L, Pietroni MA, Ryan ET, et al. Factors associated with encephalopathy in patients with *Salmonella enterica* serotype Typhi bacteremia presenting to a diarrheal hospital in Dhaka, Bangladesh. *Am J Trop Med Hyg*. 2012 Apr;86(4):698-702.
6. Mtove G, Amos B, von Seidlein L, Hendriksen I, Mwambuli A, Kimera J, et al. Invasive salmonellosis among children admitted to a rural Tanzanian hospital and a comparison with previous studies. *PLoS One*. 2010;5(2):e9244.
7. Owais A, Sultana S, Zaman U, Rizvi A, Zaidi AK. Incidence of typhoid bacteremia in infants and young children in southern coastal Pakistan. *Pediatr Infect Dis J*. 2010 Nov;29(11):1035-9.
8. Pradhan R, Shrestha U, Gautam SC, Thorson S, Shrestha K, Yadav BK, et al. Bloodstream infection among children presenting to a general hospital outpatient clinic in urban Nepal. *PLoS One*. 2012;7(10):e47531
9. Siddiqui FJ, Rabbani F, Hasan R, Nizami SQ, Bhutta ZA. Typhoid fever in children: some epidemiological considerations from Karachi, Pakistan. *Int J Infect Dis*. 2006;10(3):215-22.
10. Tatli MM, Aktas G, Kosecik M, Yilmaz A. Treatment of typhoid fever in children with a flexible-duration of ceftriaxone, compared with 14-day treatment with chloramphenicol. *Int J Antimicrob Agents*. 2003;21(4):350-3.
11. Walia M, Gaiind R, Mehta R, Paul P, Aggarwal P, Kalaivani M. Current perspectives of enteric fever: a hospital-based study from India. *Ann Trop Paediatr*. 2005;25(3):161-74.
12. Walia M, Gaiind R, Paul P, Mehta R, Aggarwal P, Kalaivani M. Age-related clinical and microbiological characteristics of enteric fever in India. *Trans R Soc Trop Med Hyg*. 2006;100(10):942-8.
13. Wang JL, Kao JH, Tseng SP, Teng LJ, Ho SW, Hsueh PR. Typhoid fever and typhoid hepatitis in Taiwan. *Epidemiol Infect*. 2005;133(6):1073-9.



Chart 1 : Definitions of variables used

| Variables                                           | As defined by author, or :                                                                                                                                                                                                                                                                                                                                              |
|-----------------------------------------------------|-------------------------------------------------------------------------------------------------------------------------------------------------------------------------------------------------------------------------------------------------------------------------------------------------------------------------------------------------------------------------|
| Multi-drug resistance                               | Resistance to all 3 of chloramphenicol, ampicillin/amoxycillin, cotrimoxazole                                                                                                                                                                                                                                                                                           |
| Weakness or malaise                                 | fatigue, weakness, dizziness, malaise, prostration                                                                                                                                                                                                                                                                                                                      |
| High grade fever                                    | > 104 F or > 40 C, hyperpyrexia, extreme hyperpyrexia                                                                                                                                                                                                                                                                                                                   |
| Toxicity                                            | toxemia or 'enteric state'                                                                                                                                                                                                                                                                                                                                              |
| Chelosis                                            | stomatitis, mouth ulcers, aphthous ulcers, parotitis, stomatitis, cracked lips                                                                                                                                                                                                                                                                                          |
| Pneumonia, bronchopneumonia or chest signs          | abnormal CXR, congestion, consolidation, rales, rhonchi, crepts, dyspnea, respiratory/chest/lung/bronchitic signs, pulmonary infiltration, bronchitis, respiratory distress, bronchial breathing, broncho-pulmonary involvement                                                                                                                                         |
| <b>Complications</b>                                |                                                                                                                                                                                                                                                                                                                                                                         |
| Altered mental status                               | mental change, encephalopathy, encephalitis, drowsy, lethargy, confusion, coma, semi-coma, delirium, psychosis, irritability, disoriented, stupor, obtundation, disordered thought, CNS disturbances, neuro-psychiatric features/manifestations, altered sensorium, clouded/altered consciousness, acute schizophrenia, global cerebral dysfunction, somnolence, apathy |
| Focal neurological signs or symptoms                | aphasia, ataxia, deafness, motor paresis, hemiplegia, tremor, difficulty speaking, nystagmus, dysarthria, slurred speech, chorea/choreoform movements, cerebellar ataxia, cerebellitis, cerebellar disease, Parkinsonism, facial palsy, unsteady gait, unsteady/falls, myelitis, transverse myelitis, CN palsy                                                          |
| Hepatitis or raised LFTs                            | elevated SGPT/ALT, hepatic dysfunction, raised LFTs or transaminases (if not disaggregated, both ALT and/or AST elevated extracted), hepato-biliary involvement (taken ALT raised as > 35 if not specified by author), or ALT and/or bilirubin elevation, liver failure                                                                                                 |
| Abdominal distention or ileus                       | tyimpanities, tympanic abdomen, meteorism, tumid abdomen, decreased or absent bowel sounds, signs of intestinal obstruction                                                                                                                                                                                                                                             |
| Renal involvement                                   | nephritis, nephrotic, proteinuria, albuminuria, raised BUN or Cr, abnormal urine d/r, hematuria, pyuria, renal failure, oliguria, nephropathy                                                                                                                                                                                                                           |
| Arthritis, arthralgia, myalgia                      | limb/extremity pain, leg pain, backache, bone pain, joint pain, joint swelling, reactive arthritis, bodyache, muscle pain                                                                                                                                                                                                                                               |
| <b>Outcome</b>                                      |                                                                                                                                                                                                                                                                                                                                                                         |
| Relapse                                             | Clinical, or clinical and culture-confirmed                                                                                                                                                                                                                                                                                                                             |
| <b>Laboratory features</b>                          |                                                                                                                                                                                                                                                                                                                                                                         |
| Anaemia(<12g/dl)                                    | undefined, moderate anaemia, Hb 5-10, 8.5-10Hct< 30%/32%, Hb<9, < 10, <=10.5, <= 11, < 12, <=12                                                                                                                                                                                                                                                                         |
| Severe anaemia (<7.5 g/dl)                          | undefined, <5, < 6, <6.5, < 6.7, < 7.4                                                                                                                                                                                                                                                                                                                                  |
| Leucopenia (<5 x 10 <sup>3</sup> /μL)               | <4, <4.5, <3, or undefined                                                                                                                                                                                                                                                                                                                                              |
| Leucocytosis (>15 x 10 <sup>3</sup> /μL)            | or undefined                                                                                                                                                                                                                                                                                                                                                            |
| Thrombocytopenia (<150 x 10 <sup>3</sup> /μL)       | <100, or undefined                                                                                                                                                                                                                                                                                                                                                      |
| Severe thrombocytopenia (<50 x 10 <sup>3</sup> /μL) | or undefined                                                                                                                                                                                                                                                                                                                                                            |
| Neutrophilia (>7.5 x 10 <sup>3</sup> /μL)           | or undefined                                                                                                                                                                                                                                                                                                                                                            |
